# Supplementary material for: 2-Arachidonoylglycerol Modulates CXCL12-Mediated Chemotaxis in Mantle Cell Lymphoma and Chronic Lymphocytic Leukemia
Source: MDPI journal article supplement (doi:10.3390/cancers15051585), 2023-03-03

Supplementary Table and Figures for manuscript Merrien et al., 2-arachidonoylglycerol modulated the CXCL12-mediated chemotaxis in mantle cell lymphoma and chronic lymphocytic leukemia.

**Supplementary Table S1.** Patients' characteristics and experiments performed on each sample (chemotaxis, CXCR4 expression).

| Patient ID | Diagnosis    | Lymphocyte count (x10 <sup>9</sup> /L) | Proportion of tumour cells (CD45+CD19+CD5+) (%) | Chemotaxis data (y yes, n no) | CXCR4 surface expression after treatments data (y yes, n no) |
|------------|--------------|----------------------------------------|-------------------------------------------------|-------------------------------|--------------------------------------------------------------|
| 1          | MCL          | 20                                     | 98,1                                            | y                             | n                                                            |
| 2          | CLL          | 19,5                                   | 98,5                                            | y                             | n                                                            |
| 3          | CLL          | 66,4                                   | 87,2                                            | y                             | n                                                            |
| 4          | CLL          | 42,6                                   | 98,9                                            | y                             | n                                                            |
| 5          | MCL          | 5,9                                    | 27*                                             | n                             | y                                                            |
| 6          | CLL          | 144,9                                  | 95,3                                            | y                             | y                                                            |
| 7          | MCL          | 58                                     | 78,7**                                          | n                             | y                                                            |
| 8          | CLL          | 25,2                                   | 97,1**                                          | n                             | y                                                            |
| 9          | CLL          | 55,8                                   | 98,3**                                          | n                             | y                                                            |
| 10         | CLL          | 21,3                                   | 96,5                                            | y                             | y                                                            |
| 11         | CLL          | 27,7                                   | 99,8                                            | y                             | y                                                            |
| 12         | CLL          | 129,9                                  | 95,1                                            | y                             | n                                                            |
| 13         | CLL          | 103,8                                  | 98,6                                            | y                             | n                                                            |
| 14         | CLL          | 66                                     | 94,1                                            | y                             | y                                                            |
| 15         | CLL          | 22,5                                   | 94,2                                            | y                             | n                                                            |
| 16         | CLL          | 11                                     | 95,7                                            | y                             | n                                                            |
| 17         | CLL          | 17,3                                   | 93,5                                            | y                             | n                                                            |
| 18         | MCL          | 50,5                                   | 99,1                                            | y                             | n                                                            |
| 19         | CLL          | 54                                     | 97,7                                            | y                             | n                                                            |
| 20         | CLL          | 93,3                                   | 98,7                                            | y                             | n                                                            |
| 21         | CLL          | 11,1                                   | 97,4                                            | y                             | n                                                            |
| 22         | CLL          | 216,6                                  | 99,6                                            | y                             | n                                                            |
| 23         | blastoid MCL | 20                                     | 92,5                                            | n                             | y                                                            |
| 24         | MCL          | 27                                     | 95,8                                            | n                             | y                                                            |
| 25         | MCL          | 60,6                                   | 98,1                                            | y                             | y                                                            |
| 26         | CLL          | 10,4                                   | 86,9                                            | y                             | n                                                            |
| 27         | CLL          | 84                                     | 99,5                                            | y                             | n                                                            |
| 28         | CLL          | 27                                     | 93,5                                            | n                             | y                                                            |
| 29         | CLL          | 18                                     | 98,4                                            | n                             | y                                                            |
| 30         | MCL          | not known                              | 99,6                                            | y                             | y                                                            |
| 31         | CLL          | 141                                    | 99,7                                            | y                             | y                                                            |
| 32         | MCL          | 89                                     | 99,3                                            | y                             | y                                                            |
| 33         | CLL          | 41,2                                   | 81,4**                                          | n                             | y                                                            |
| 34         | CLL          | 17,9                                   | 68,4**                                          | n                             | y                                                            |
| 35         | CLL          | 41,4                                   | 95,7**                                          | n                             | y                                                            |
| 36         | CLL          | 6,9                                    | 97**                                            | n                             | y                                                            |
| 40         | CLL          | 100                                    | 99,3                                            | y                             | n                                                            |
| 41         | CLL          | 335                                    | 97,5                                            | y                             | n                                                            |
| 42         | CLL          | 114                                    | 99                                              | y                             | n                                                            |

Supplementary Table and Figures for manuscript Merrien et al., 2-arachidonoylglycerol modulated the CXCL12-mediated chemotaxis in mantle cell lymphoma and chronic lymphocytic leukemia.

**Supplementary Figure S1:** **A)** Gating strategy to quantify the efficiency of RosetteSep to enrich the lymphoma cells. Cells were gated on CD45 positive cells, and CD19+CD5+ cells were quantified. CXCR4 was also quantified with flow cytometry method and median fluorescence intensity (MFI) was used for the quantification. **B)** Chemotaxis of primary MCL and CLL cells grouped together towards 2-AG; paired sample Wilcoxon signed rank test, \*\*\* $p < 0.001$ . **C)** CXCR4 surface expression in JeKo-1, Granta519 and JVM-2 analysis by flow cytometry.

**Supplementary Figure S2:** **A)** Standard curve of calcein-AM stained cells and the fluorescence intensity in JeKo-1, Granta519 and JVM-2 cell lines. **B)** *CNR1* and *CNR2* mRNA expression after specific siRNA; paired *t*-test, \* $p < 0.05$ , \*\* $p < 0.01$ , \*\*\*\* $p < 0.0001$ , ns: non-significant. **C)** Chemotaxis of JeKo-1 cells treated with *CNR1* or *CNR2* siRNA towards medium or 2-AG (100nM),  $n=3$ . **D)** JeKo-1 cell proliferation and viability after electroporation of specific siRNA; paired *t*-test, \* $p < 0.05$ , \*\* $p < 0.01$ , \*\*\* $p < 0.001$ , \*\*\*\* $p < 0.0001$ .

**Supplementary Figure S3:** Chemotaxis towards CXCL12 after incubation for 20 minutes with A) the CB1 antagonist SR141716 (10nM) or with B) the CB2 inverse agonist SR144528 (10nM), in JeKo-1 cell line.

**Supplementary Figure S4:** Effect of 2-AG titration on the phospho-pathways. JeKo-1 cells were incubated for 2 minutes with CXCL12 (200ng/ml) or 2-AG at three different concentrations: 100nM, 1 $\mu$ M and 10 $\mu$ M, and the activation of the signaling pathways ERK1/2, Akt and p38 was assessed by Western blotting, normalizing phospho/GAPDH band intensity to total/GAPDH as described in the material and methods, bars represent an average of the ratio of at least four repeats and error bars are standard error of the mean; paired *t*-test, \*\* $p < 0.01$ , \*\*\*\* $p < 0.0001$ ; a representative blot for each experiment is shown.

**Supplementary Figure S5:** **A)** Effects of 2-AG on CXCR4 surface expression in primary MCL and CLL cells. Basal CXCR4 surface expression in MCL and CLL cells are shown as median fluorescence intensity (MFI); Mann-Whitney test, ns: non-significant. **B)** CXCR4 surface expression after 10 minutes incubation with 2-AG (100nM), CXCL12 (200ng/ml) or the combination of 2-AG and CXCL12 in MCL and CLL samples, shown as normalized to incubation with vehicle set as 1; Paired *t*-test, ns: non-significant, \*\* $p < 0.01$ , \*\*\* $p < 0.001$ , \*\*\*\* $p < 0.00001$ .

Supplementary Table and Figures for manuscript Merrien et al., 2-arachidonoylglycerol modulated the CXCL12-mediated chemotaxis in mantle cell lymphoma and chronic lymphocytic leukemia.

**Supplementary Figure S6:** Cannabinoid receptor expression. A) CB1 and D) CB2 protein expression in the MCL cell lines JVM-2 and JeKo-1, in the T cell line Jurkat and in cortex protein lysate (Novus Biologicals), by western blotting, as well as in B) the brain cell line U-251 and E) Jurkat by immunofluorescence. Respective mRNA expression is shown in C) *CNR1* and F) *CNR2*.

Supplementary Table and Figures for manuscript Merrien et al., 2-arachidonoylglycerol modulated the CXCL12-mediated chemotaxis in mantle cell lymphoma and chronic lymphocytic leukemia.

Supplementary Figure S1

Supplementary Figure S1

A.

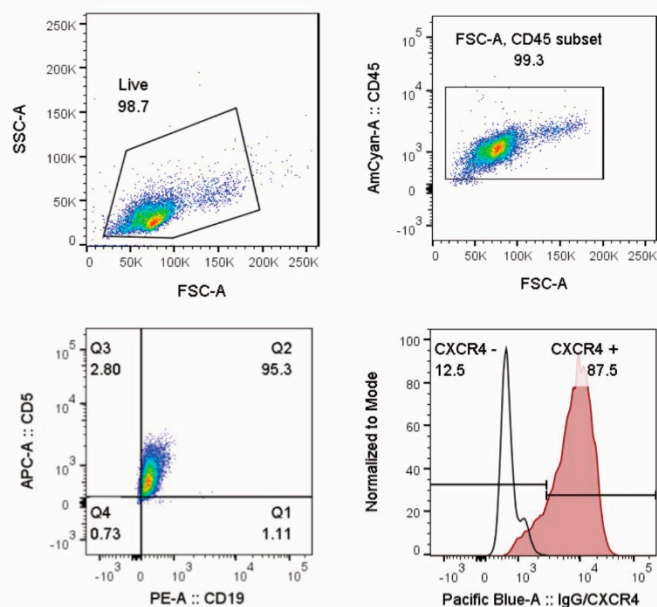

B.

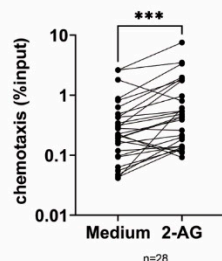

C.

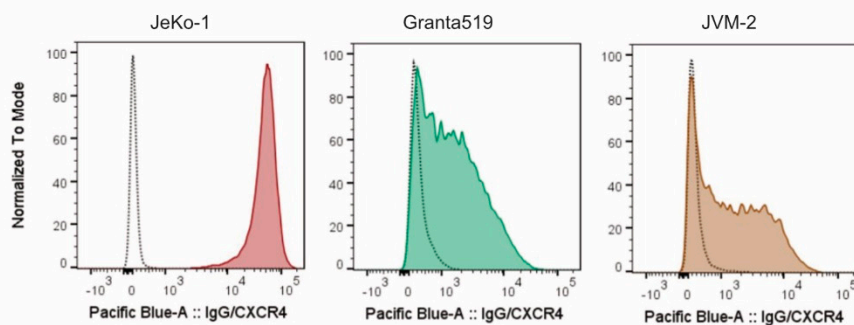

Supplementary Table and Figures for manuscript Merrien et al., 2-arachidonoylglycerol modulated the CXCL12-mediated chemotaxis in mantle cell lymphoma and chronic lymphocytic leukemia.

Supplementary Figure S2

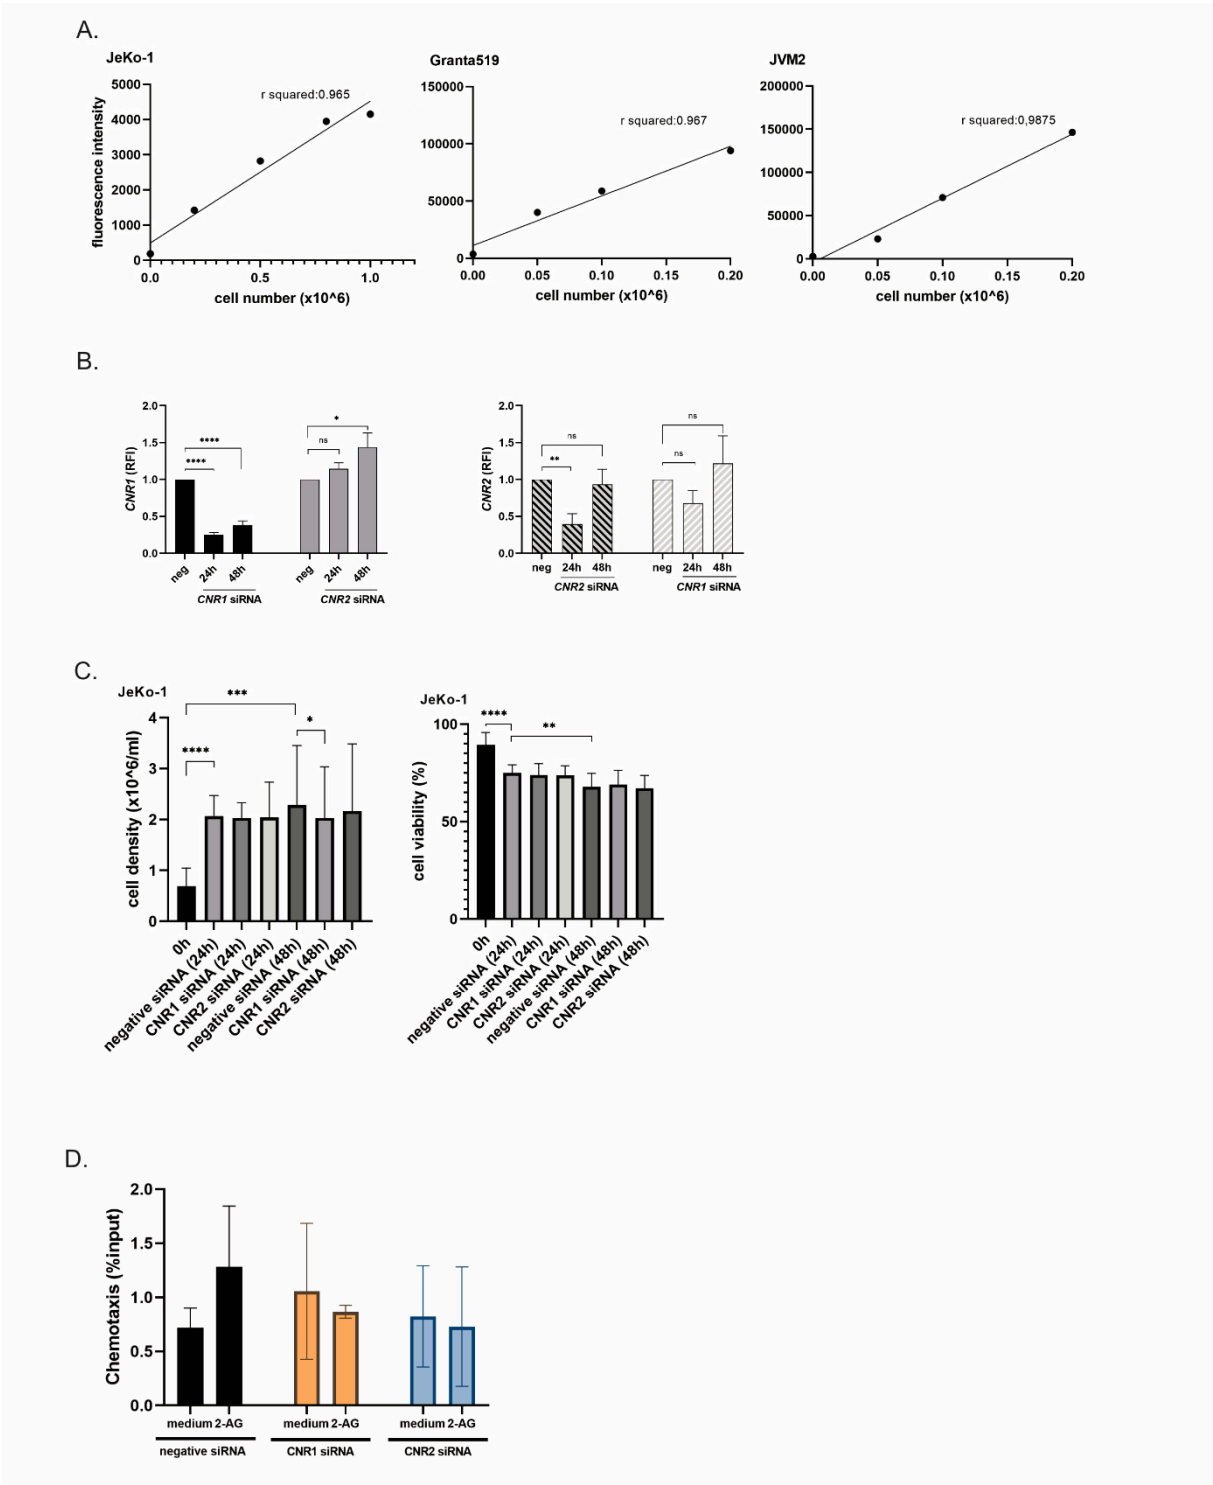

Supplementary Figure S3

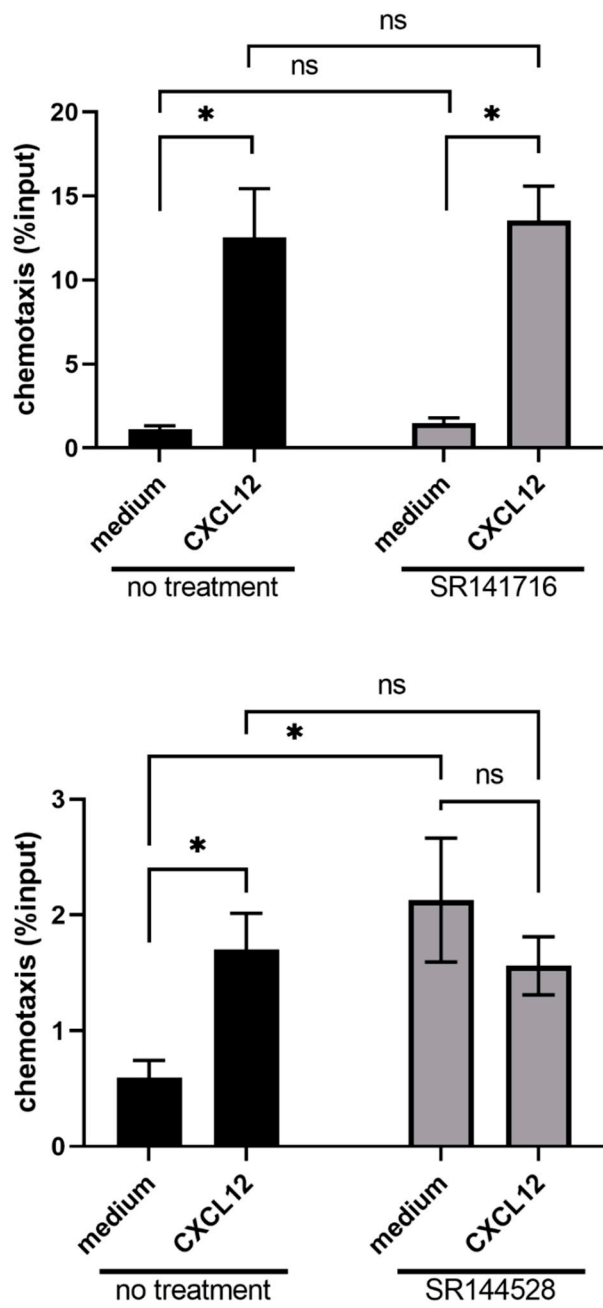

Supplementary Figure S4

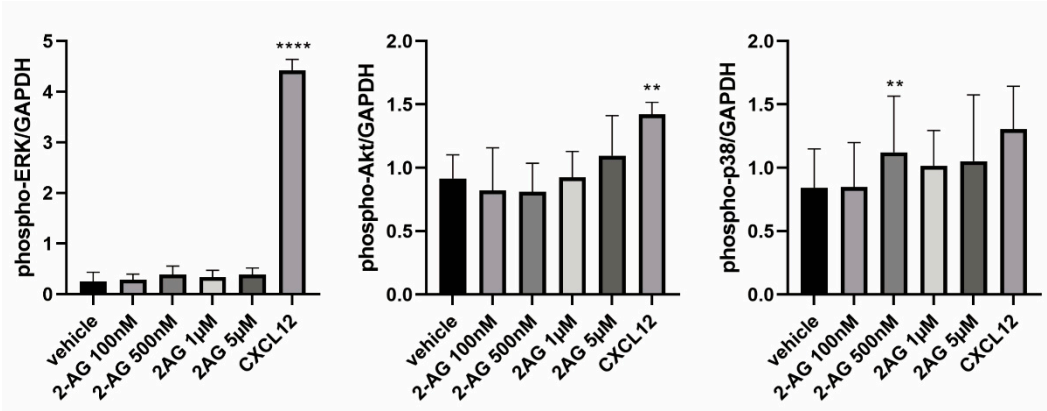

Supplementary Figure S5

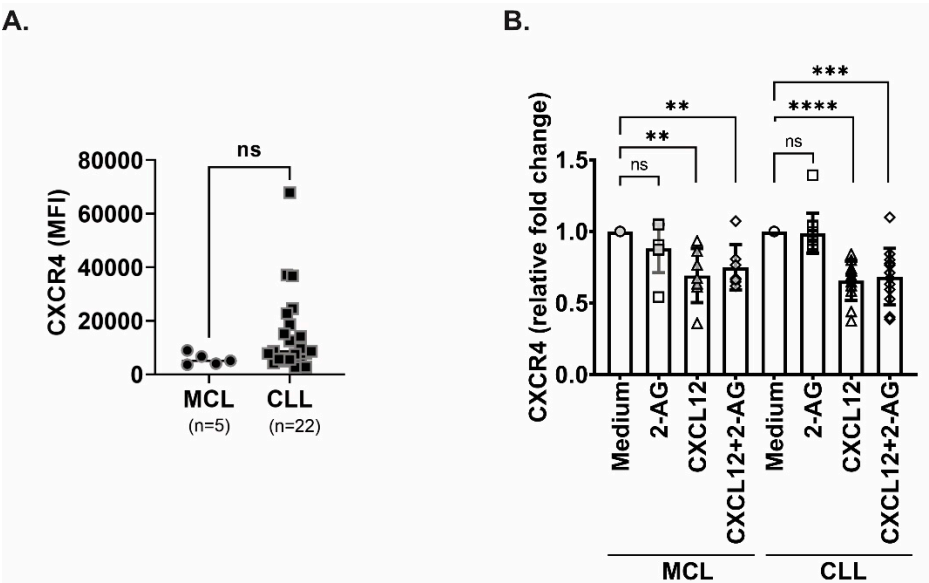

Supplementary Figure S6

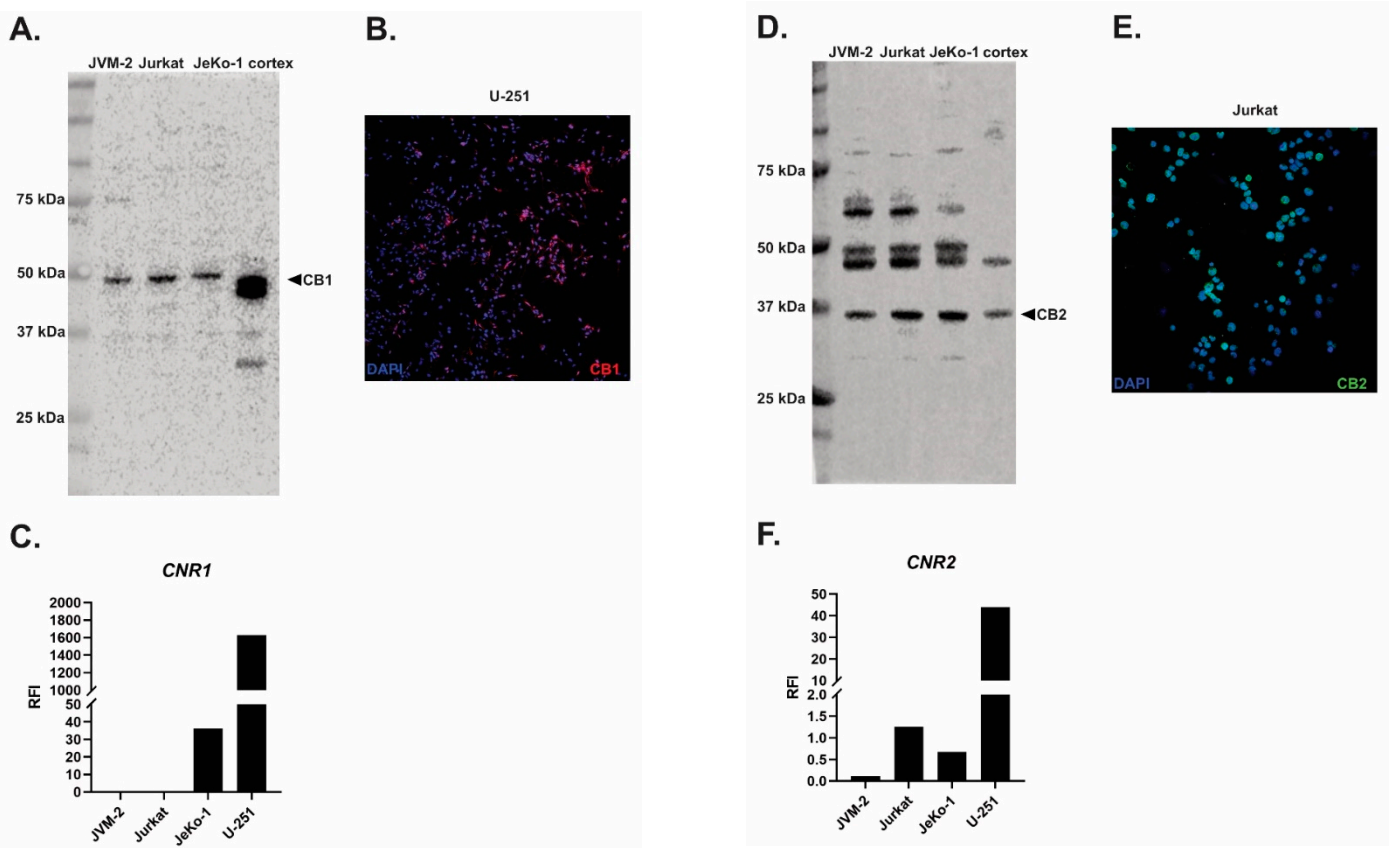

Supplement: s1 [file s1]
