# Supplementary material for: 2-Arachidonoylglycerol Modulates CXCL12-Mediated Chemotaxis in Mantle Cell Lymphoma and Chronic Lymphocytic Leukemia
Source: MDPI journal article supplement (doi:10.3390/cancers15051585), 2023-03-03

**Merrien et al.,  
2-arachidonoylglycerol modulates CXCL12-mediated chemotaxis in mantle cell  
lymphoma and chronic lymphocytic leukemia**

Original Images for Blots

Figure 7

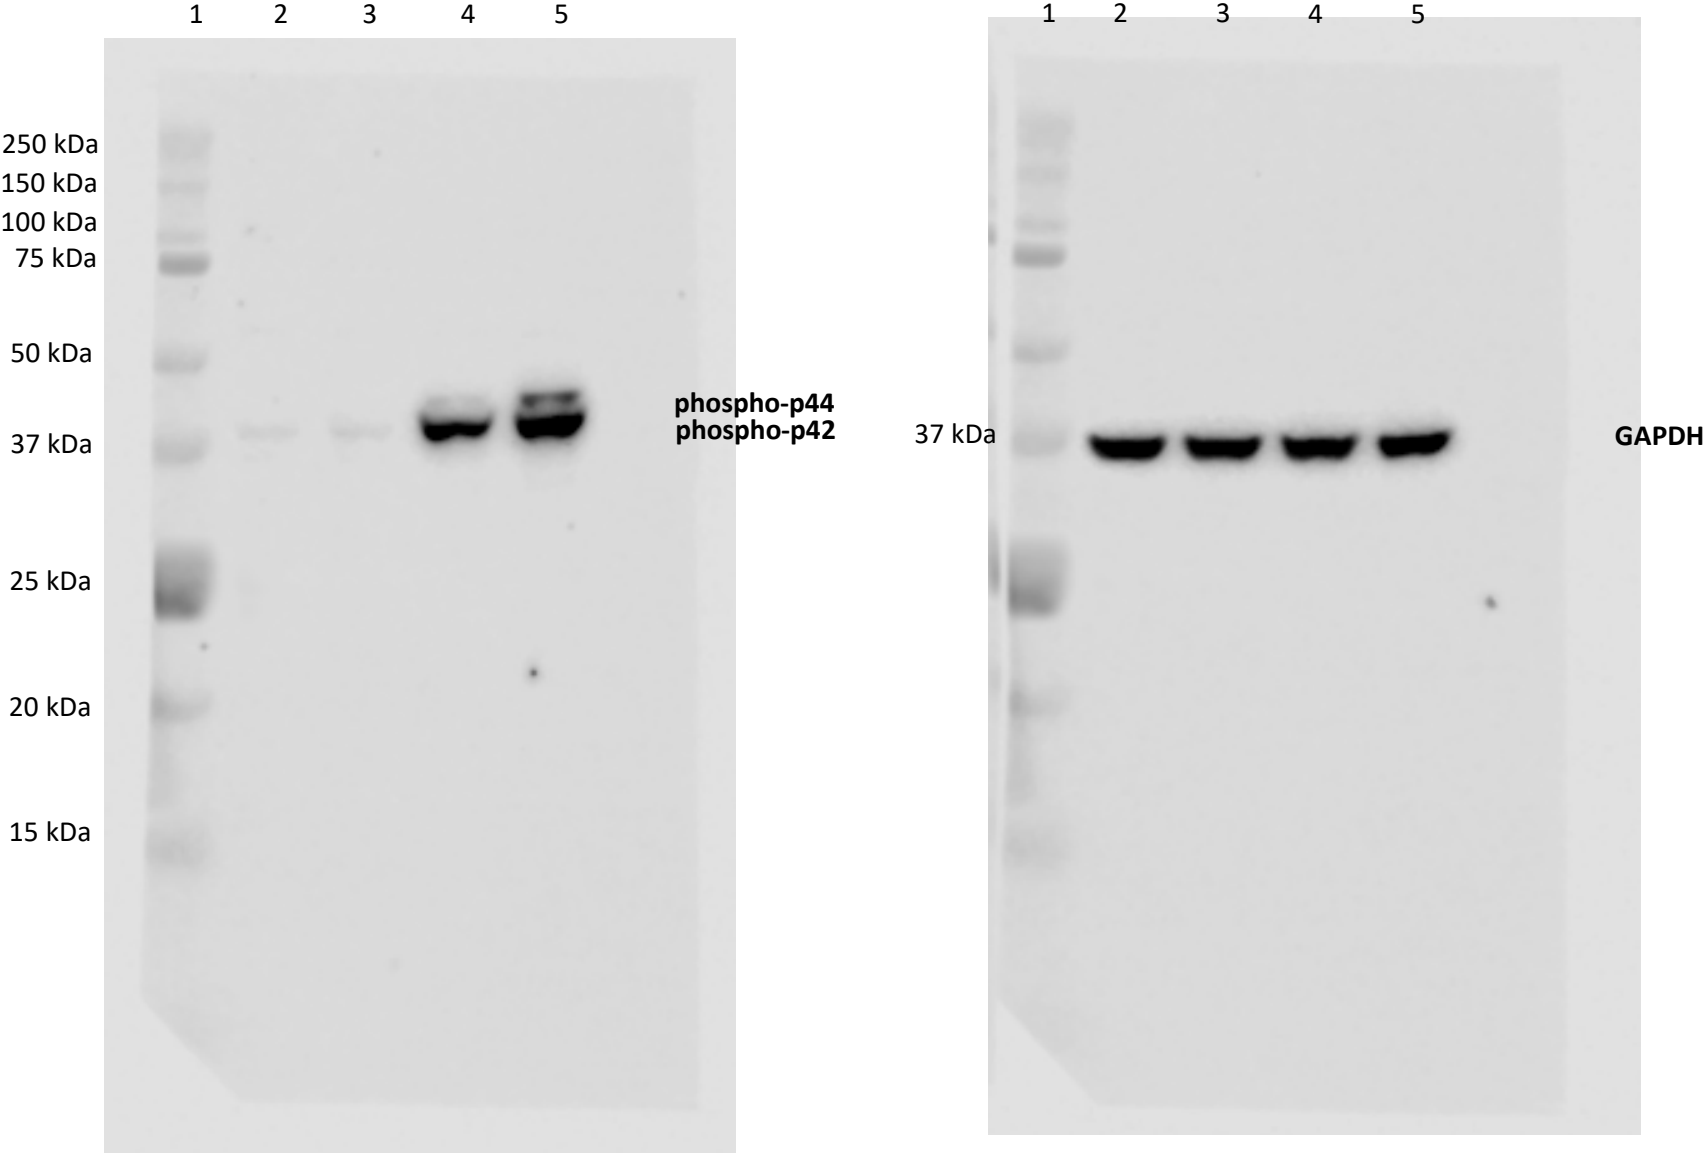

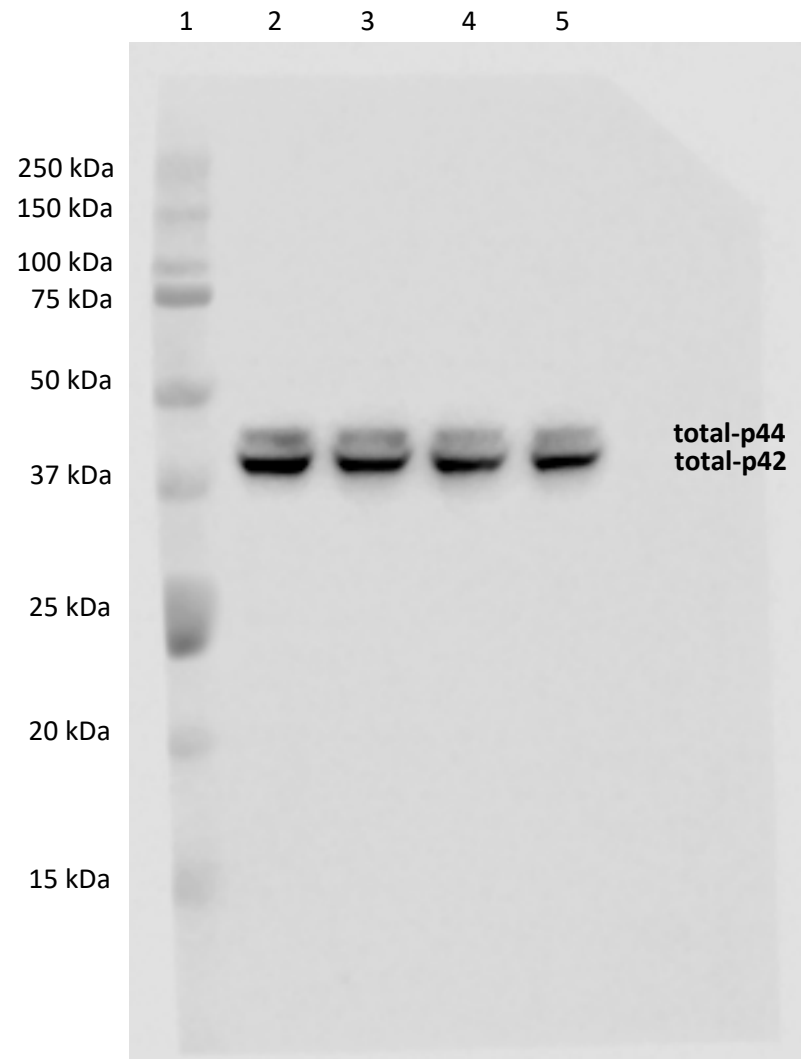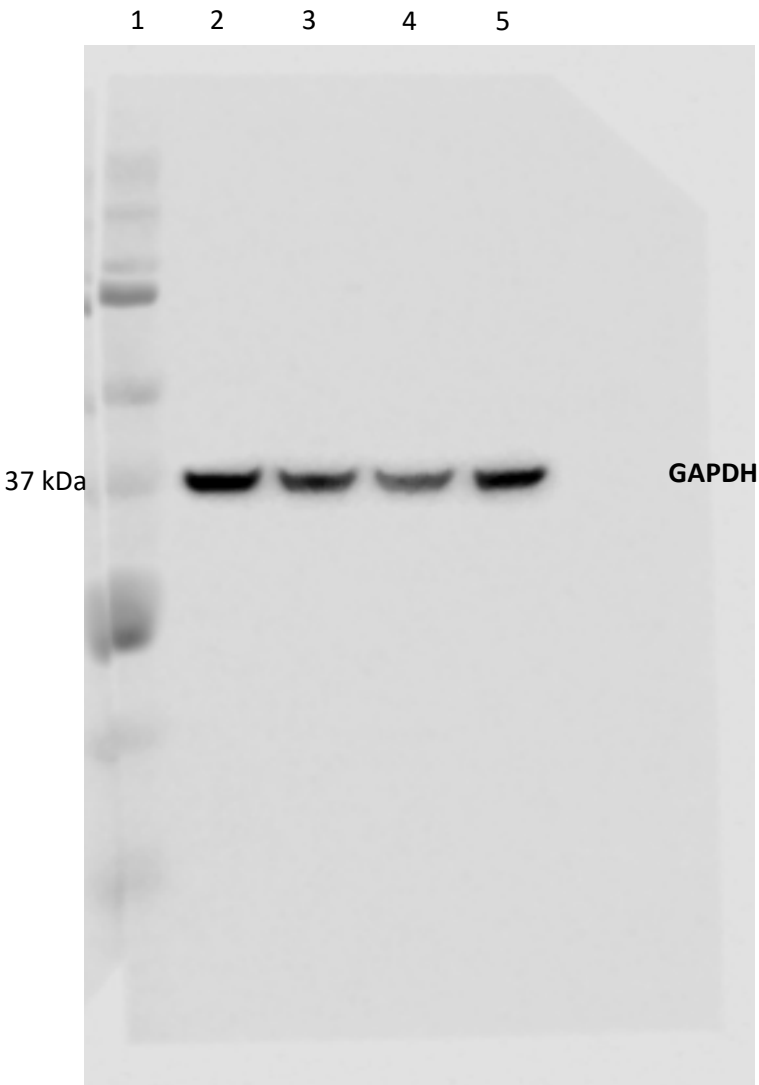

- 1 ladder
- 2 vehicle
- 3 2-AG
- 4 CXCL12
- 5 CXCL12+2-AG

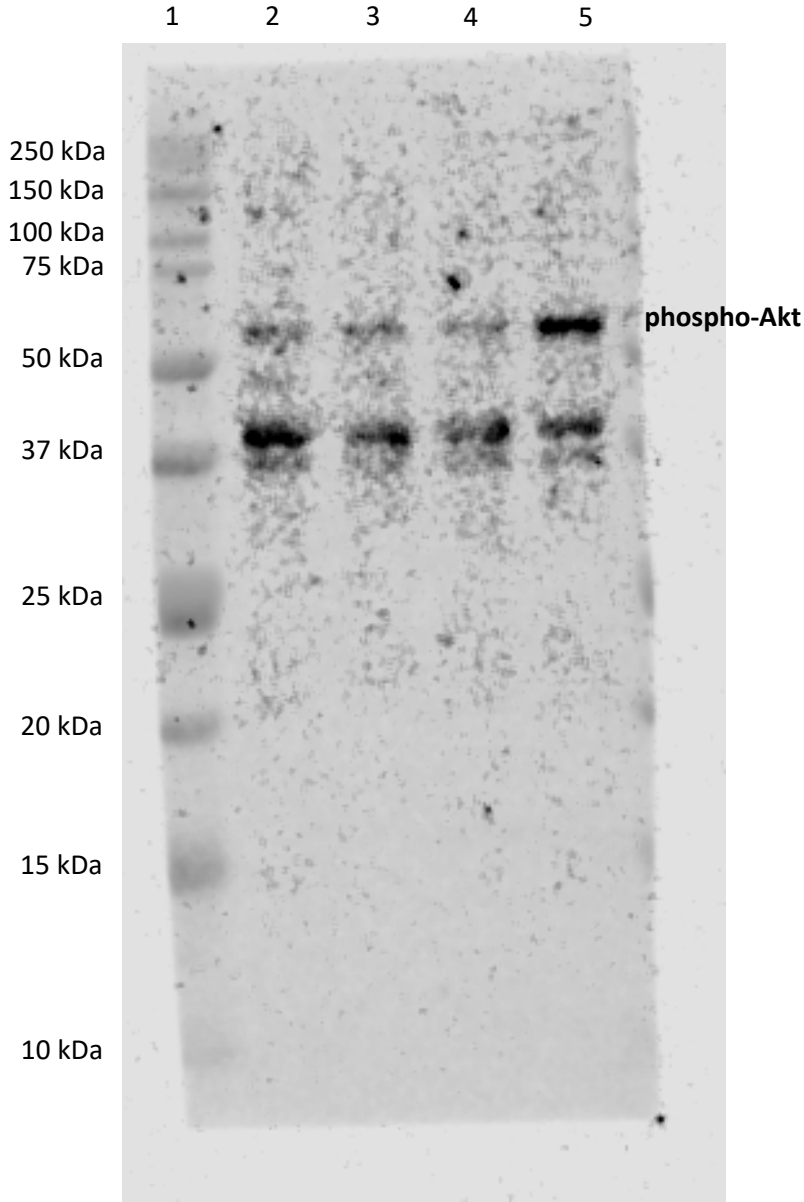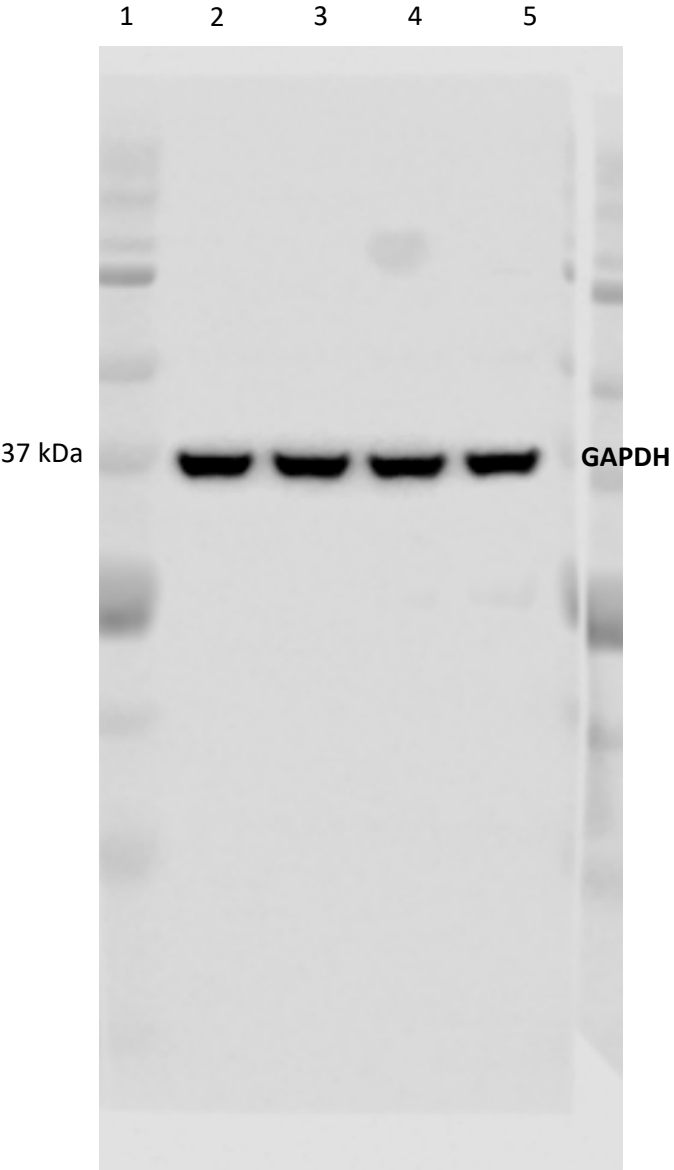

- 1 ladder
- 2 vehicle
- 3 2-AG
- 4 CXCL12
- 5 CXCL12+2-AG

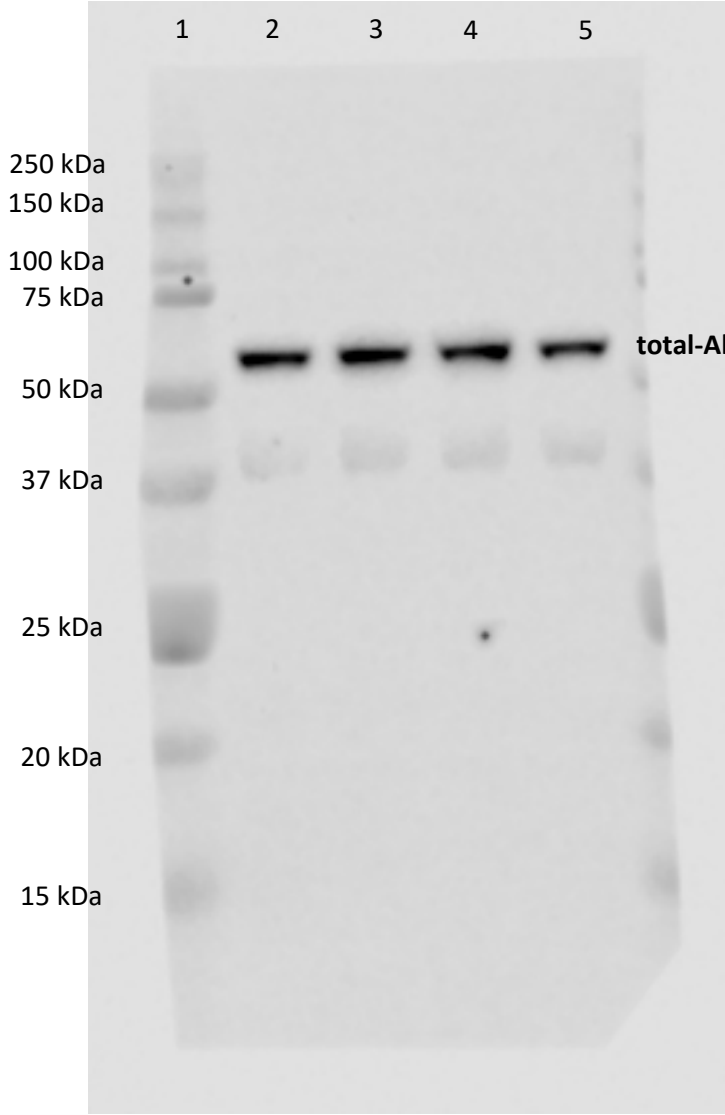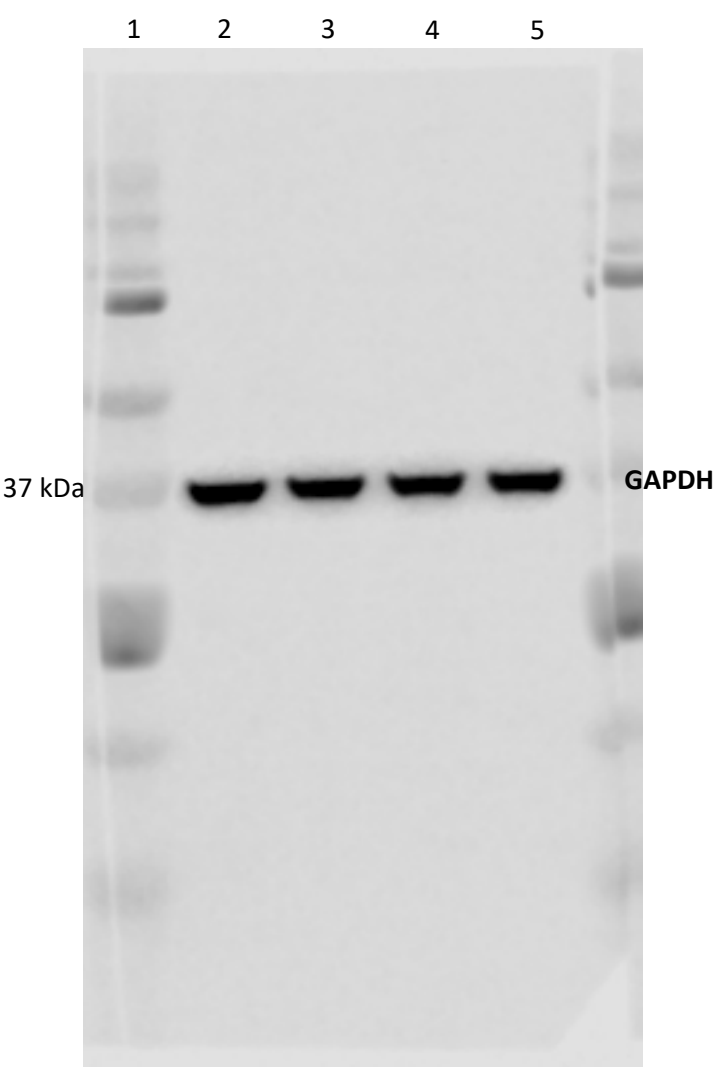

- 1 ladder
- 2 vehicle
- 3 2-AG
- 4 CXCL12
- 5 CXCL12+2-AG

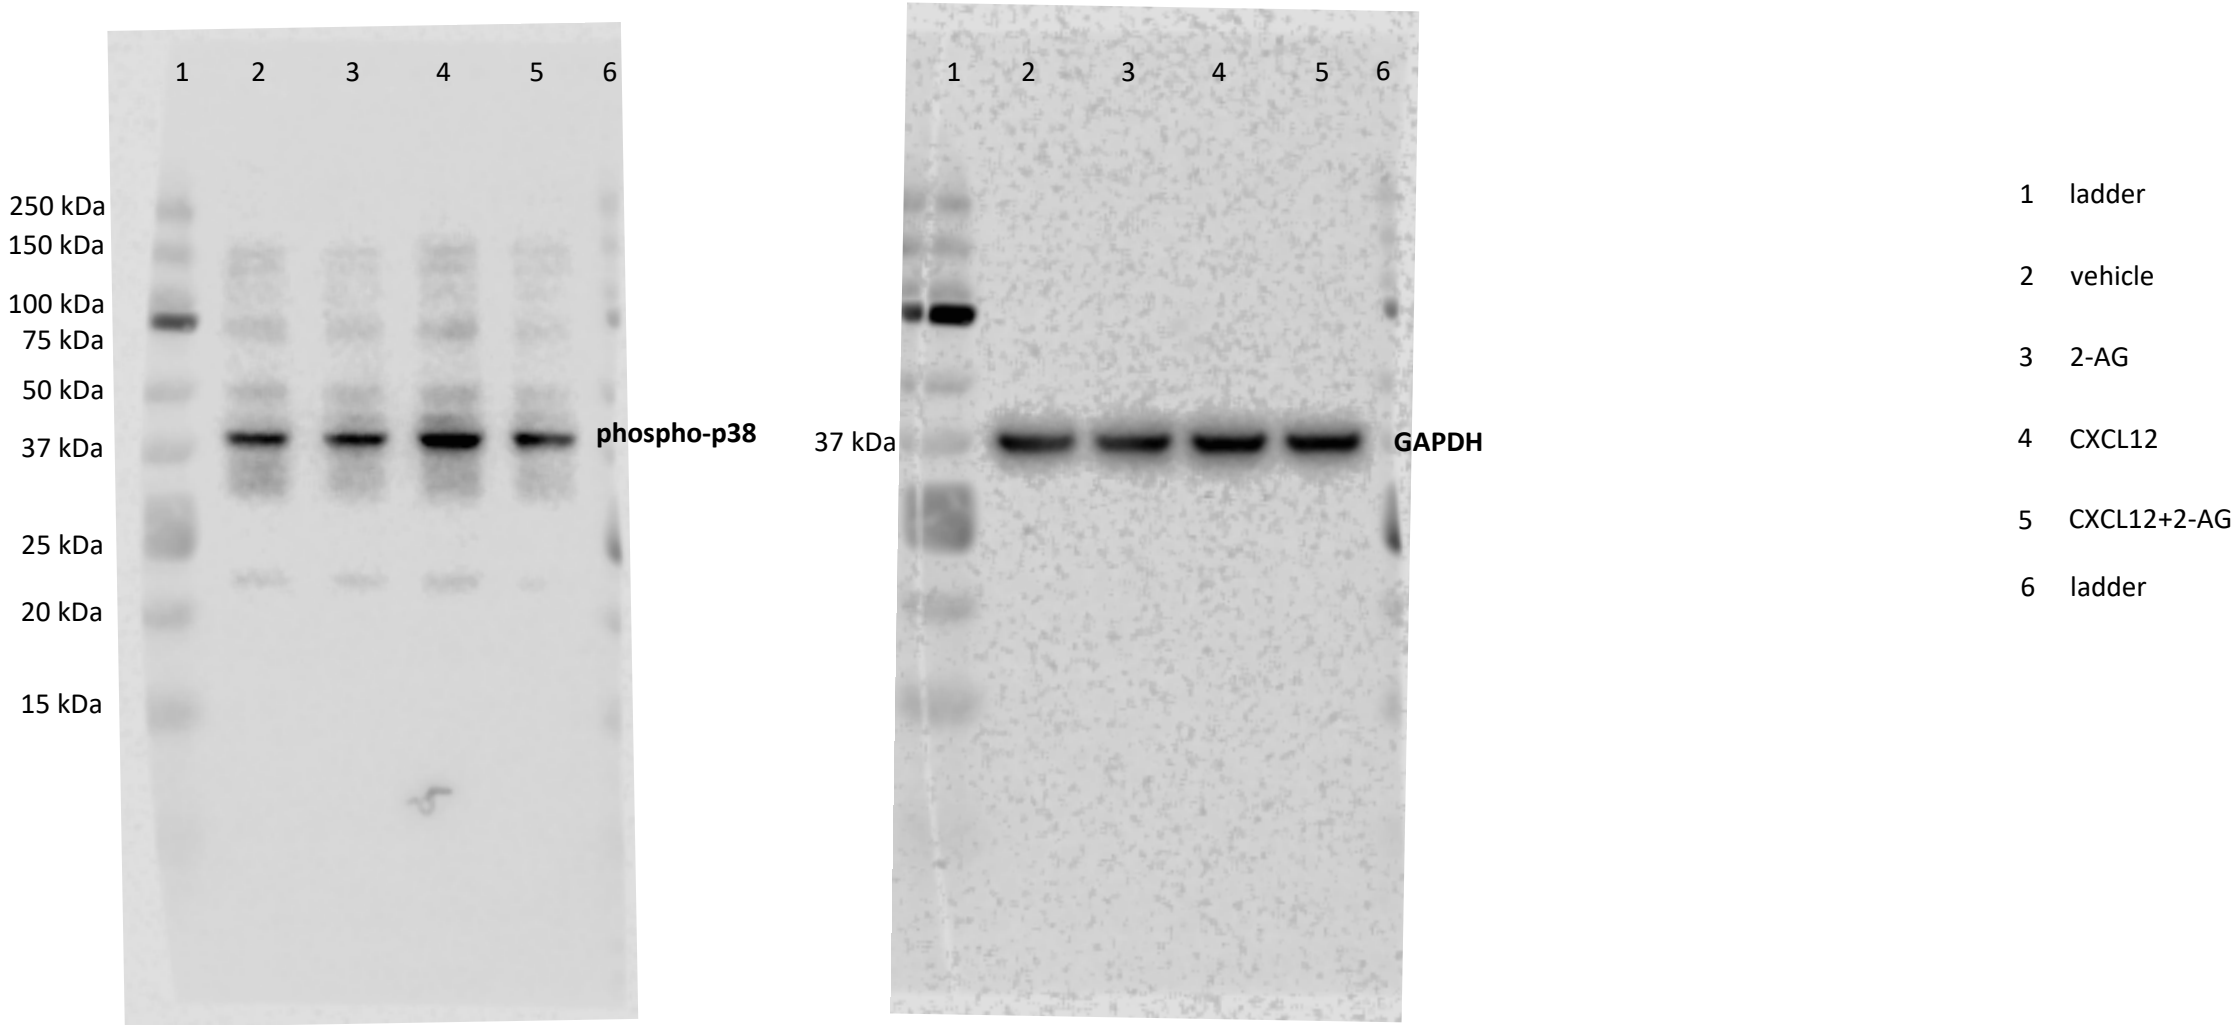

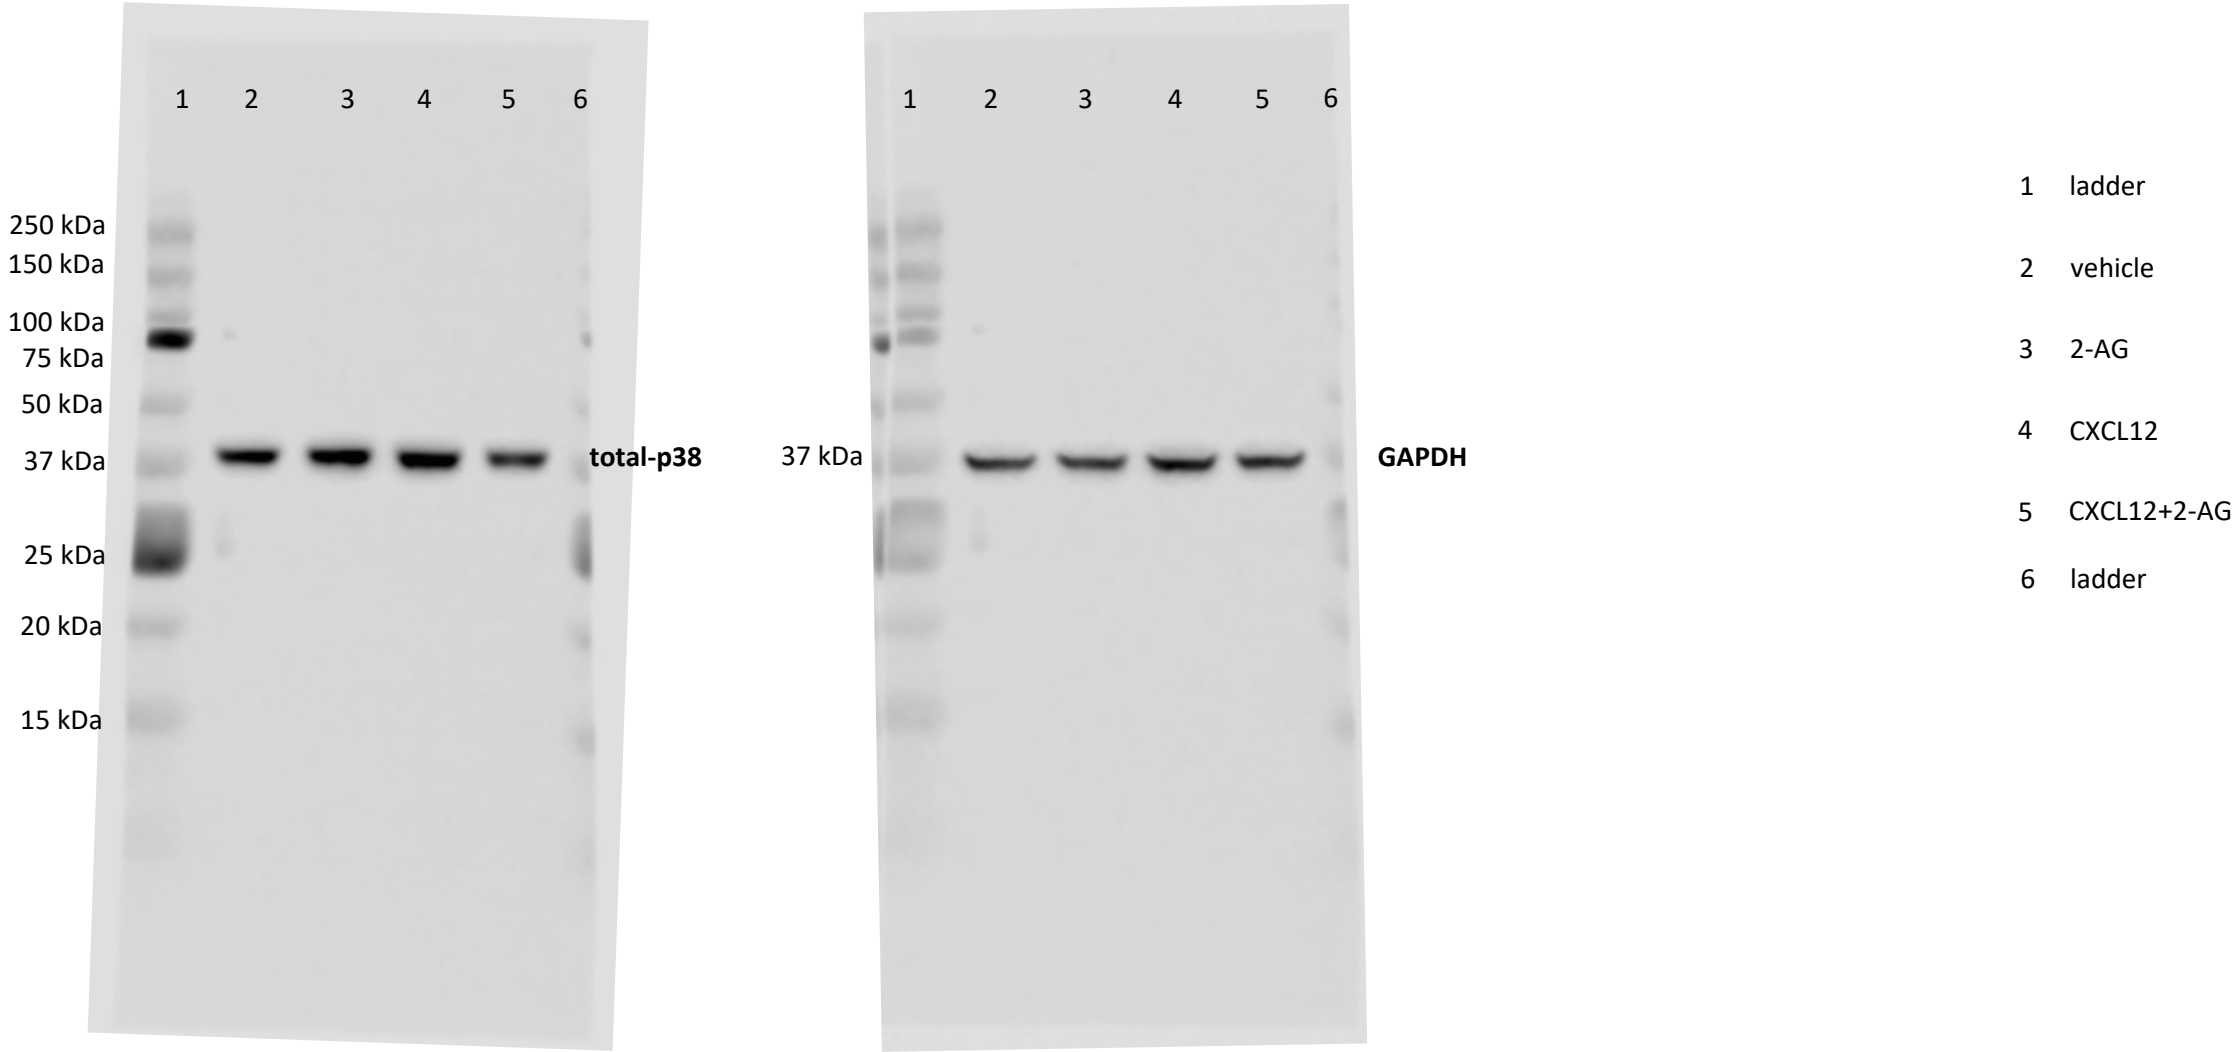



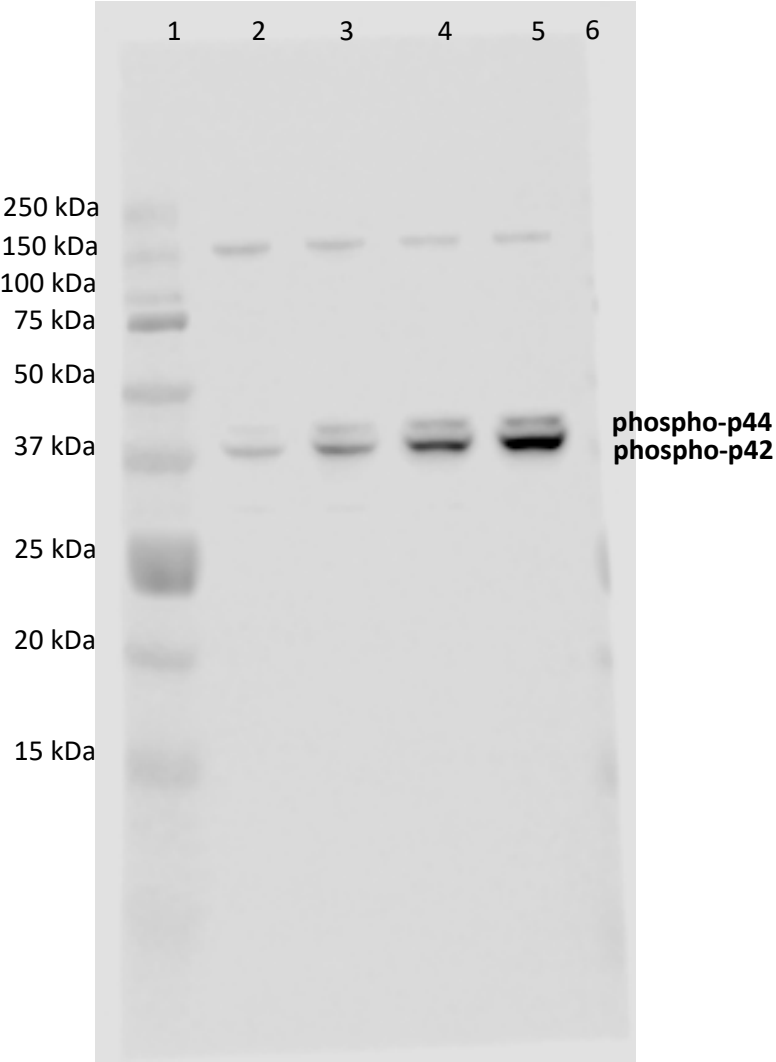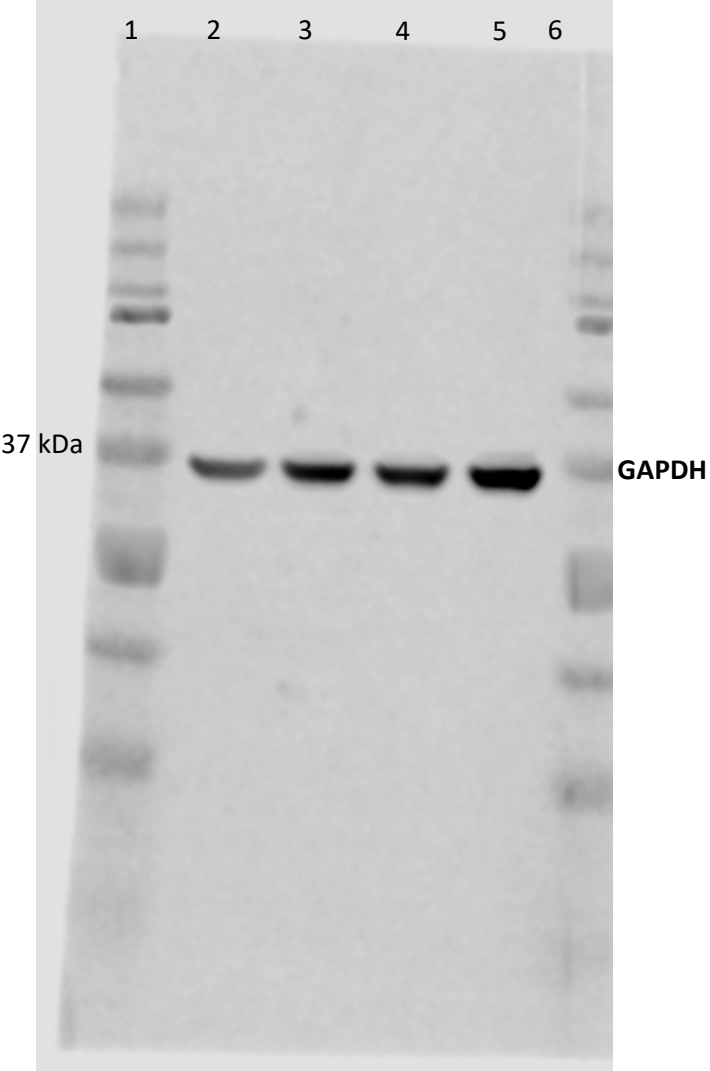

- 1 ladder
- 2 vehicle
- 3 2-AG
- 4 CXCL12
- 5 CXCL12+2-AG
- 6 ladder

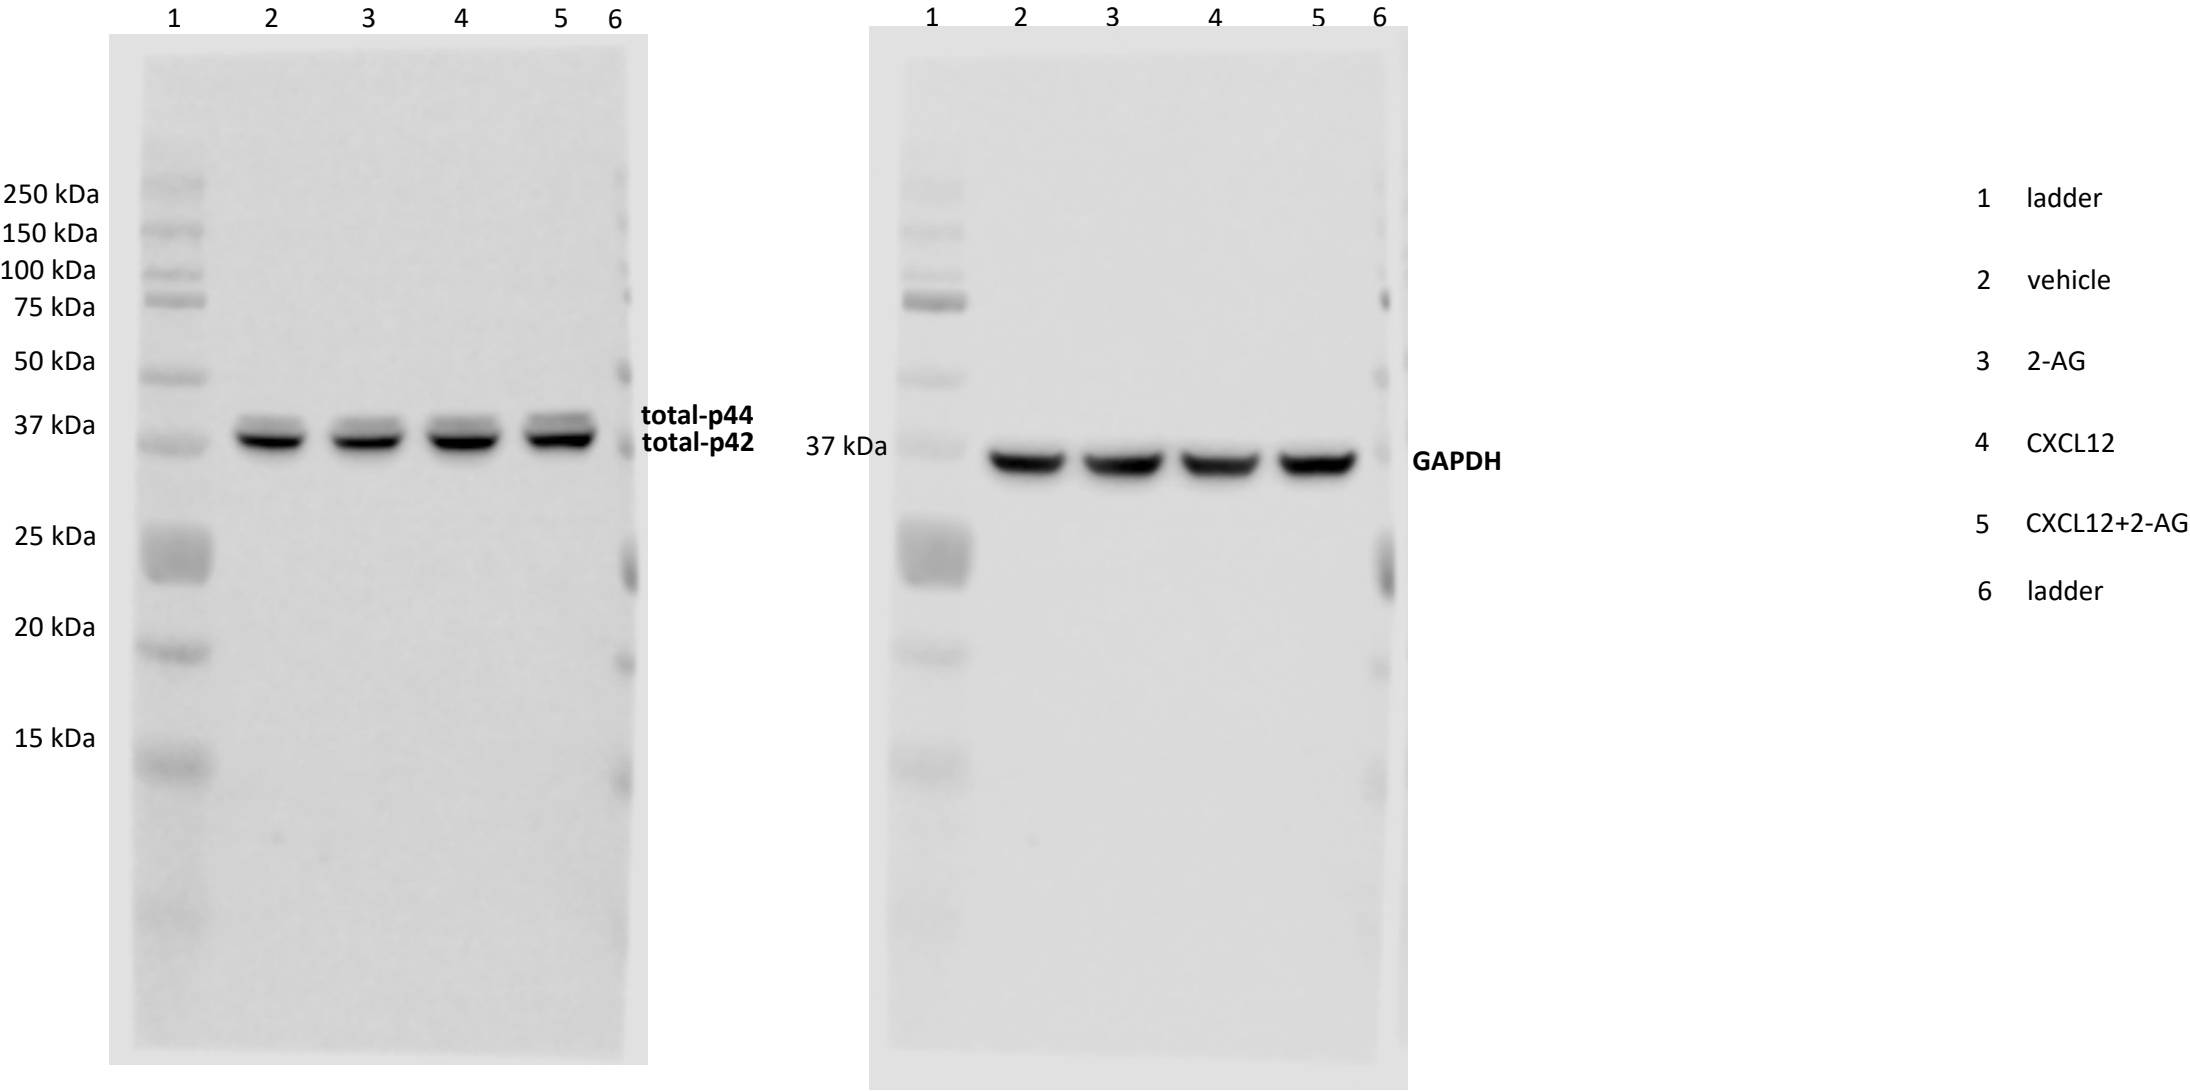

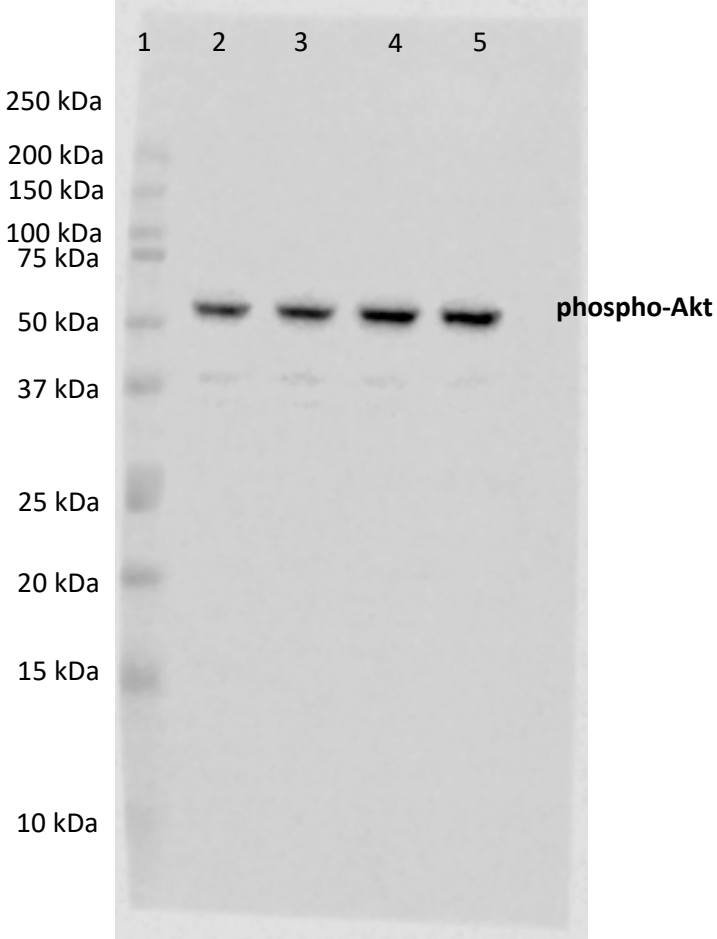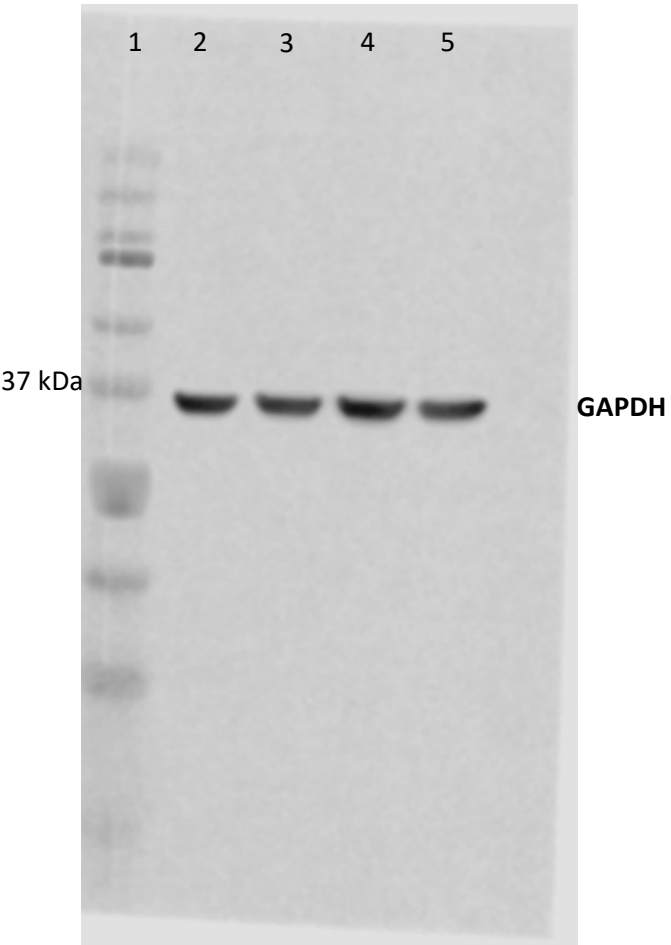

- 1 ladder
- 2 vehicle
- 3 2-AG
- 4 CXCL12
- 5 CXCL12+2-AG

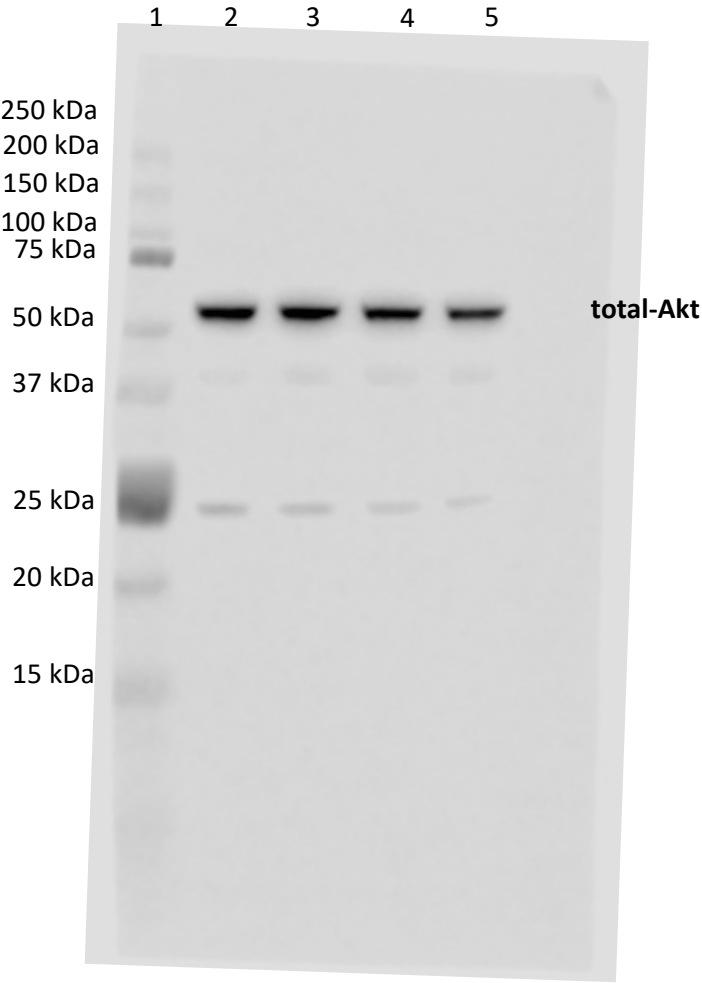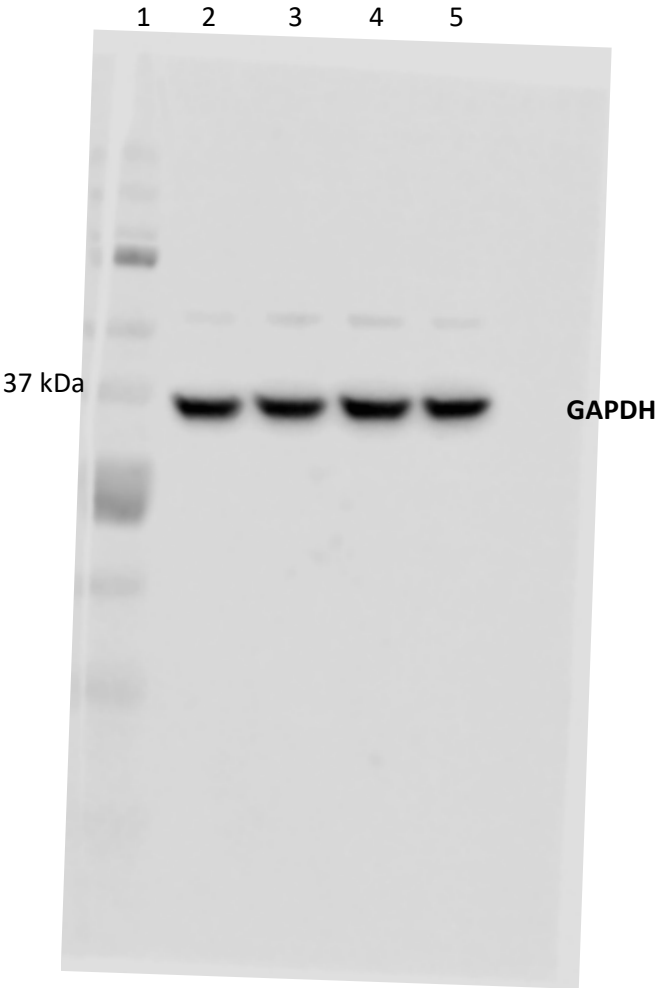

- 1 ladder
- 2 vehicle
- 3 2-AG
- 4 CXCL12
- 5 CXCL12+2-AG

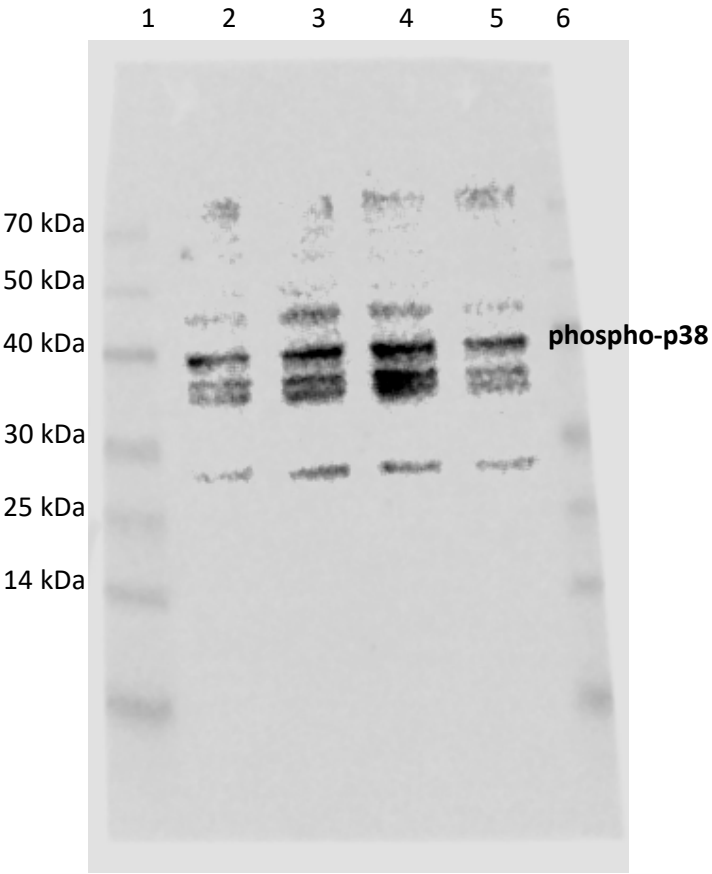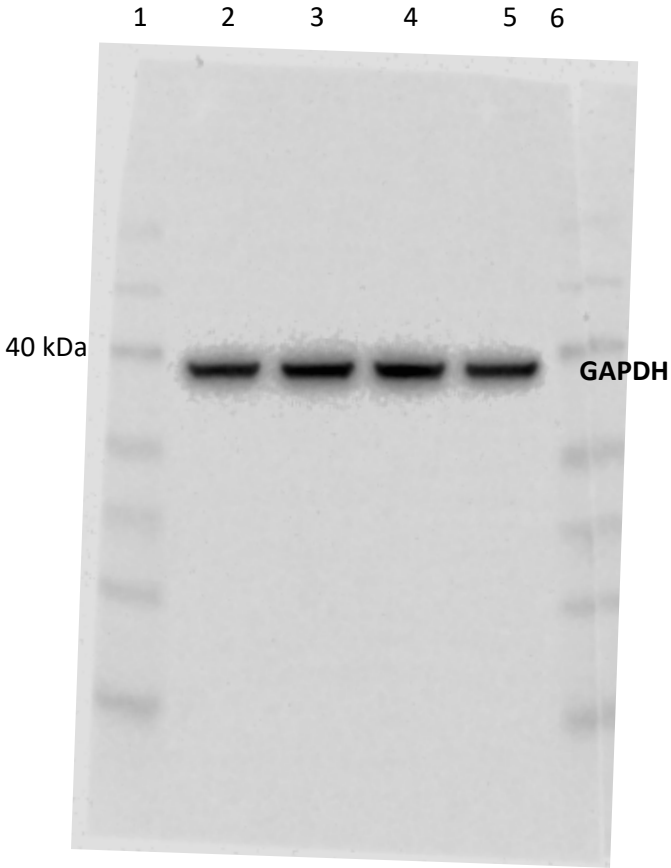

- 1 ladder
- 2 vehicle
- 3 2-AG
- 4 CXCL12
- 5 CXCL12+2-AG
- 6 ladder

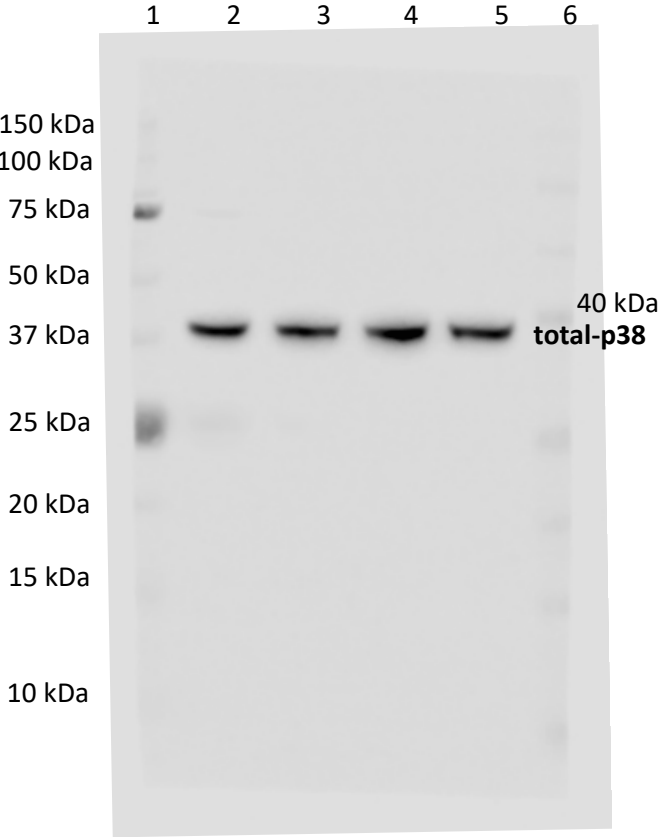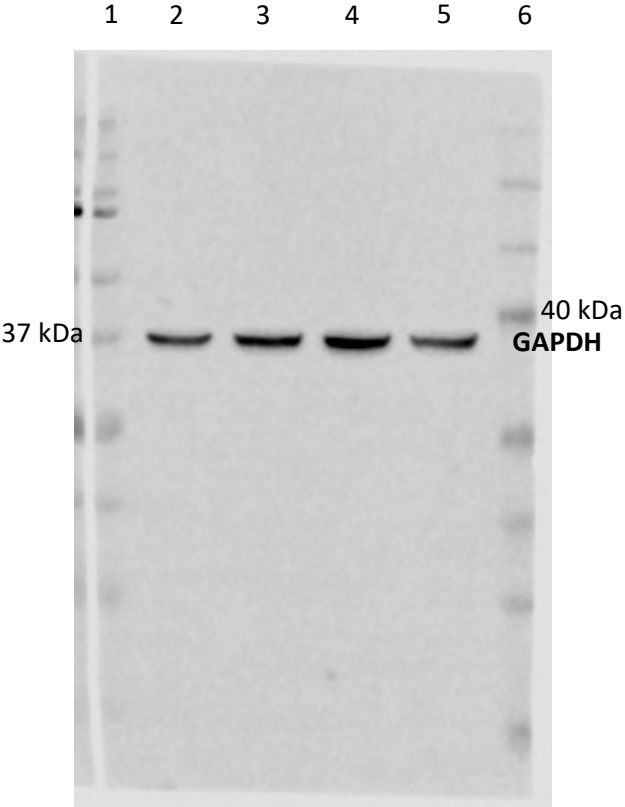

- 1 ladder
- 2 vehicle
- 3 2-AG
- 4 CXCL12
- 5 CXCL12+2-AG
- 6 ladder

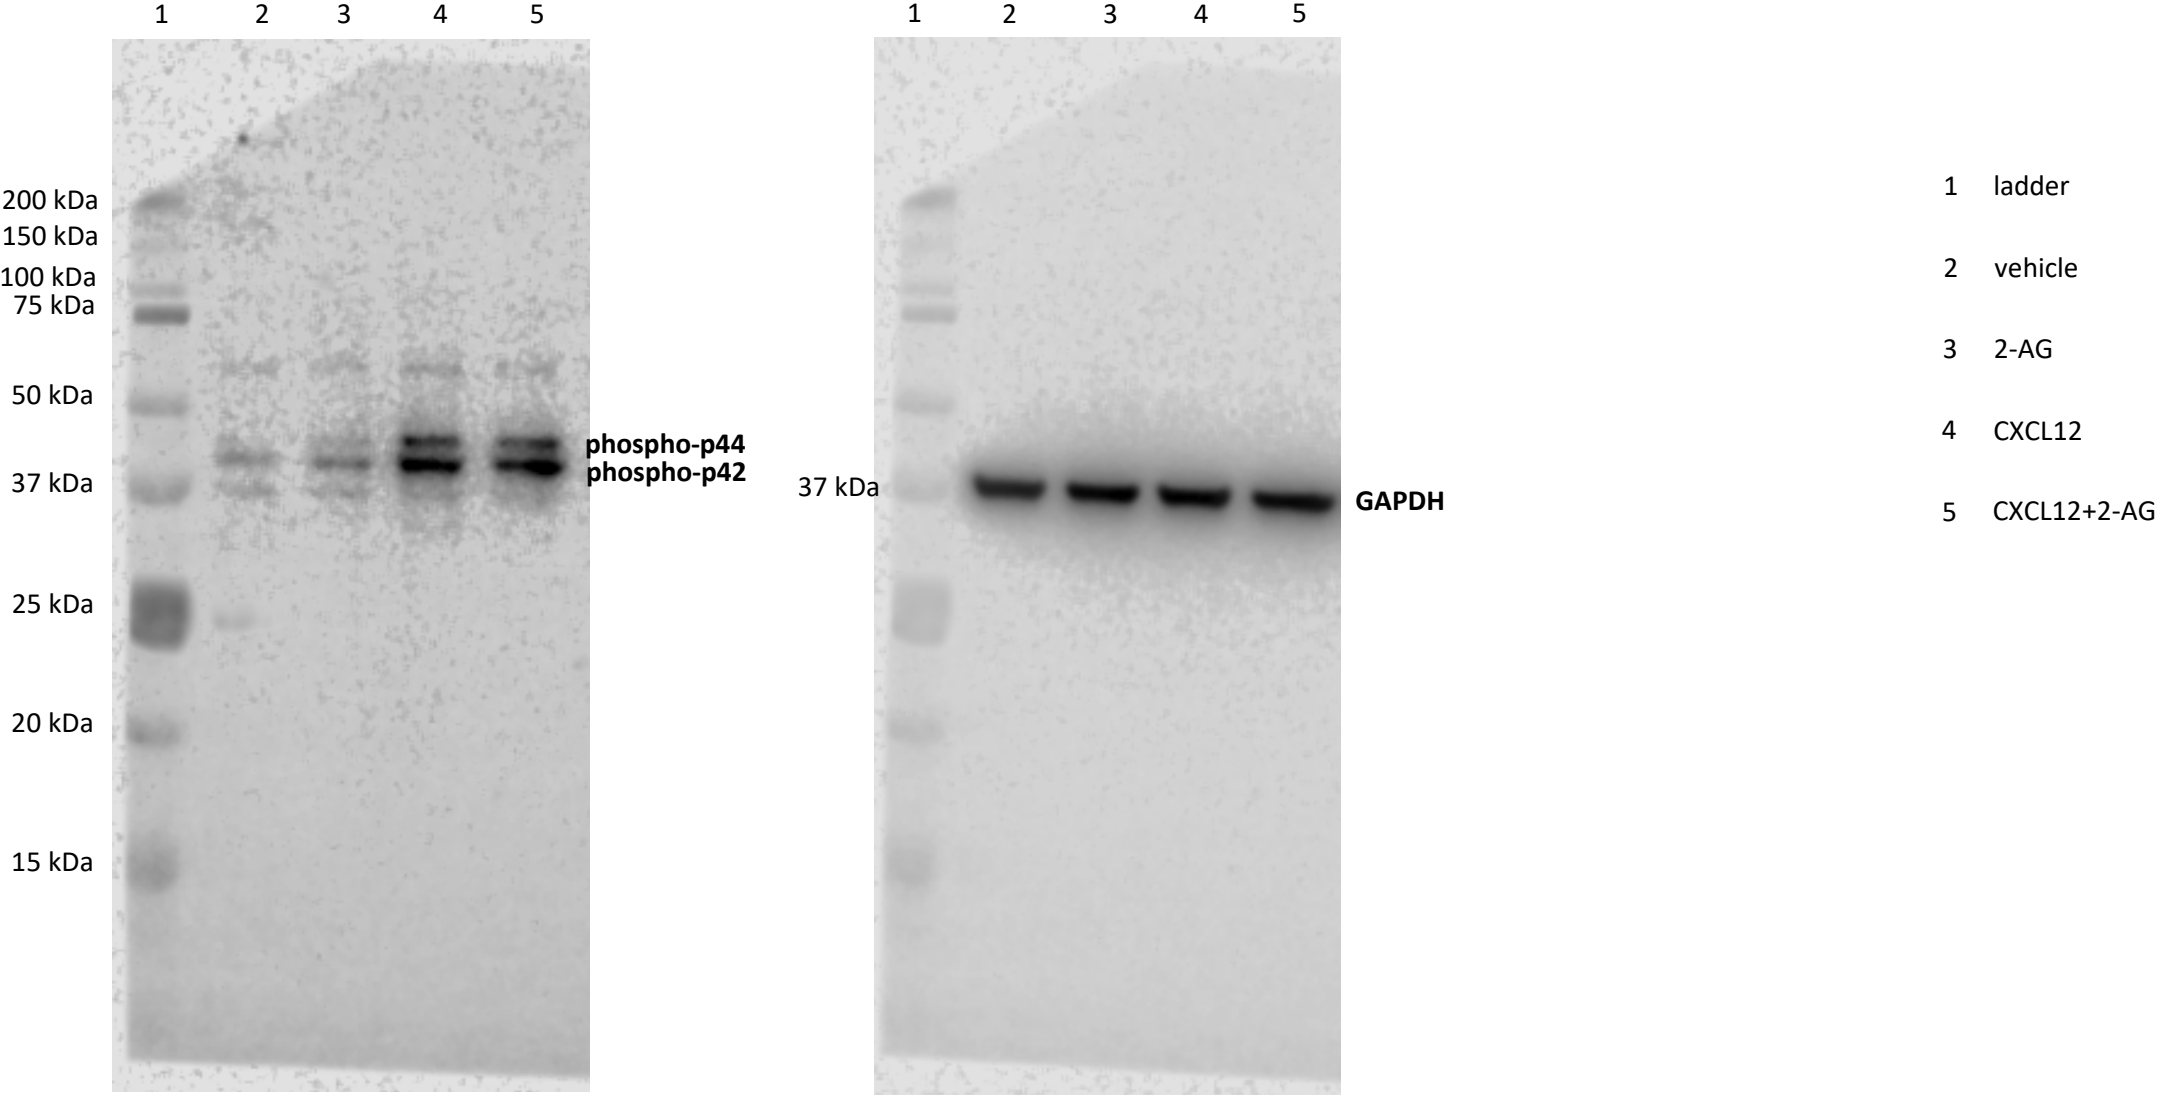

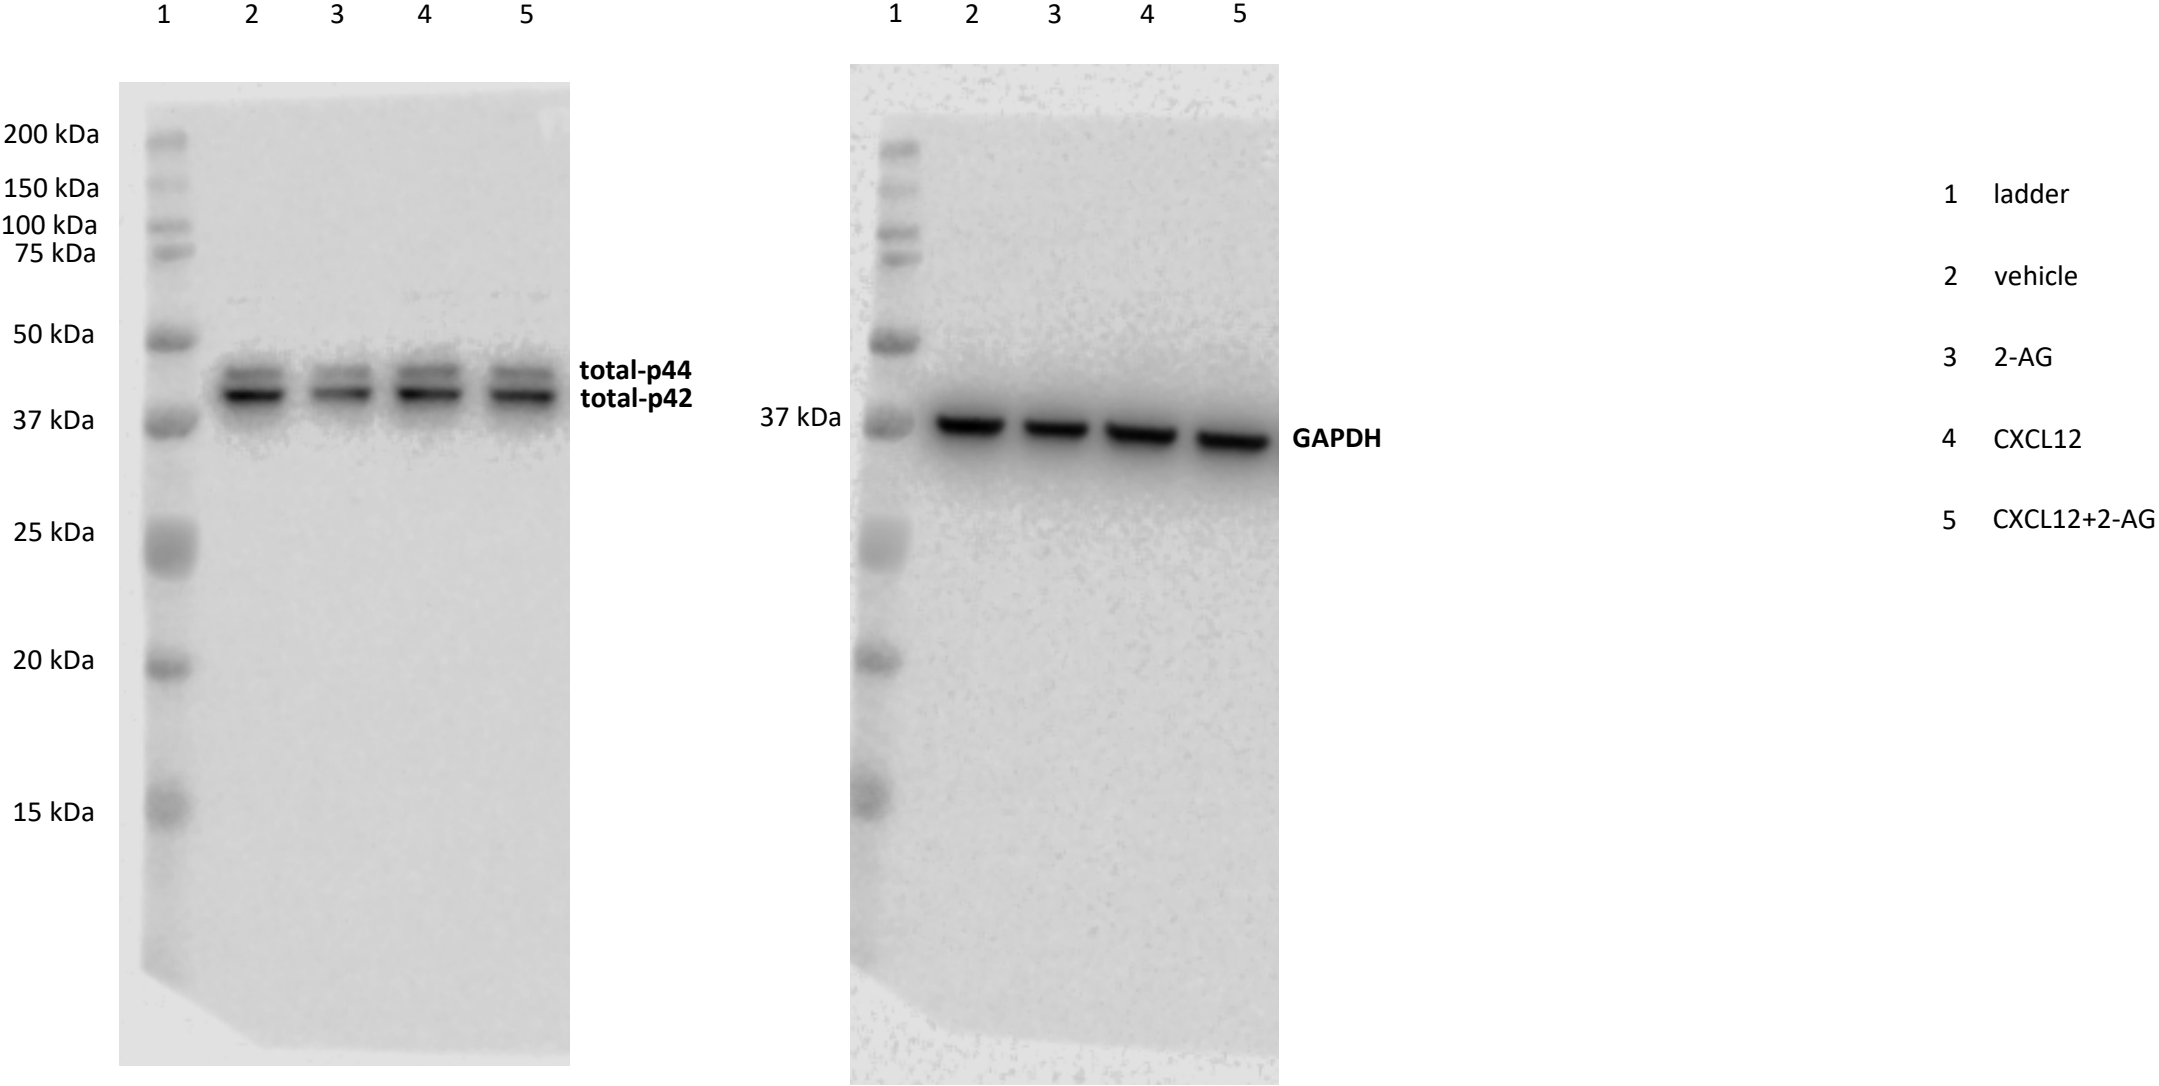



JeKo-1 cell line

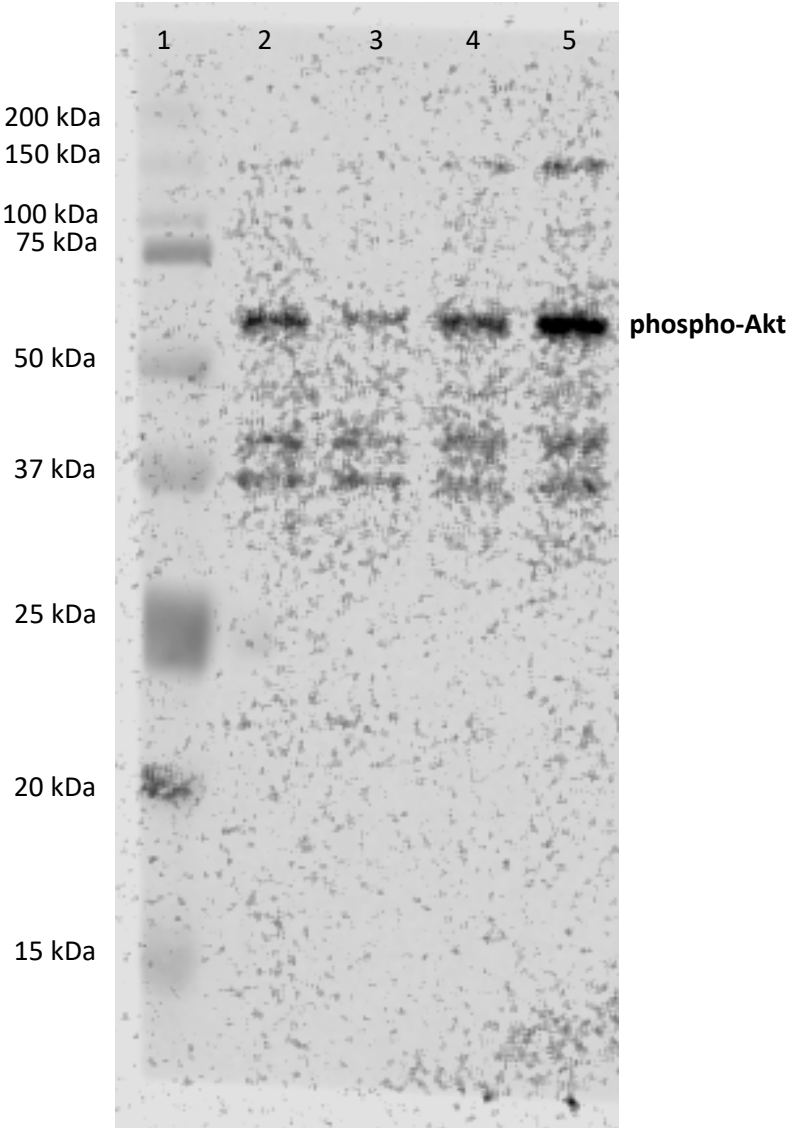

JeKo-1 – phospho-Akt- 20200430

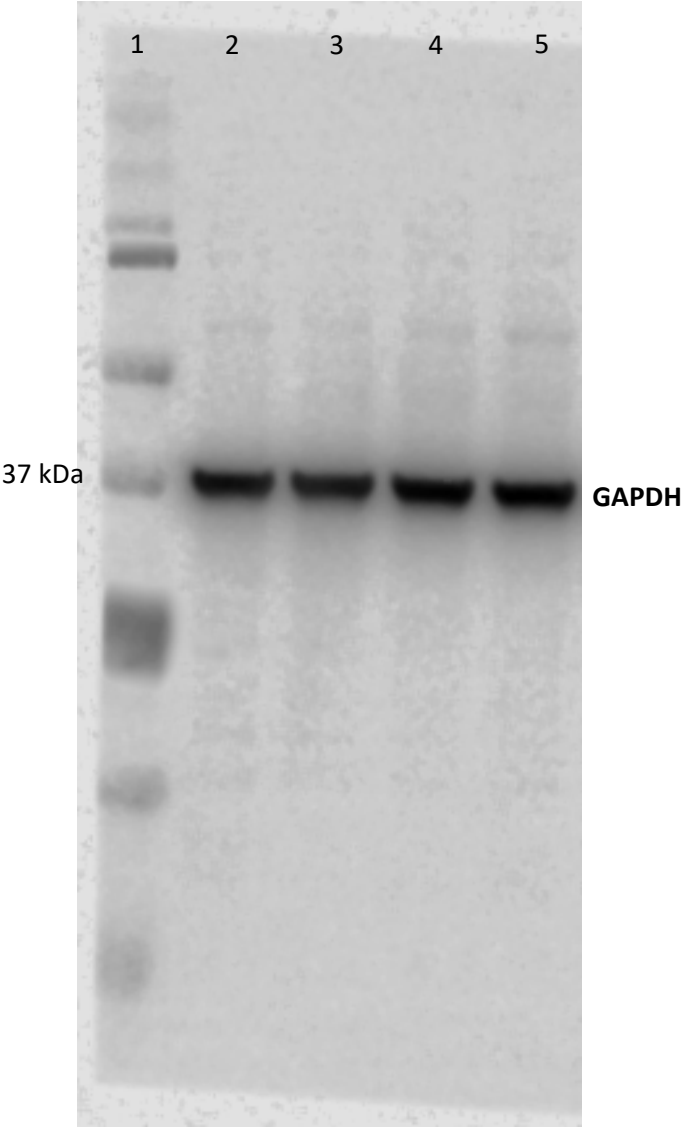

- 1 ladder
- 2 vehicle
- 3 2-AG
- 4 CXCL12
- 5 CXCL12+2-AG

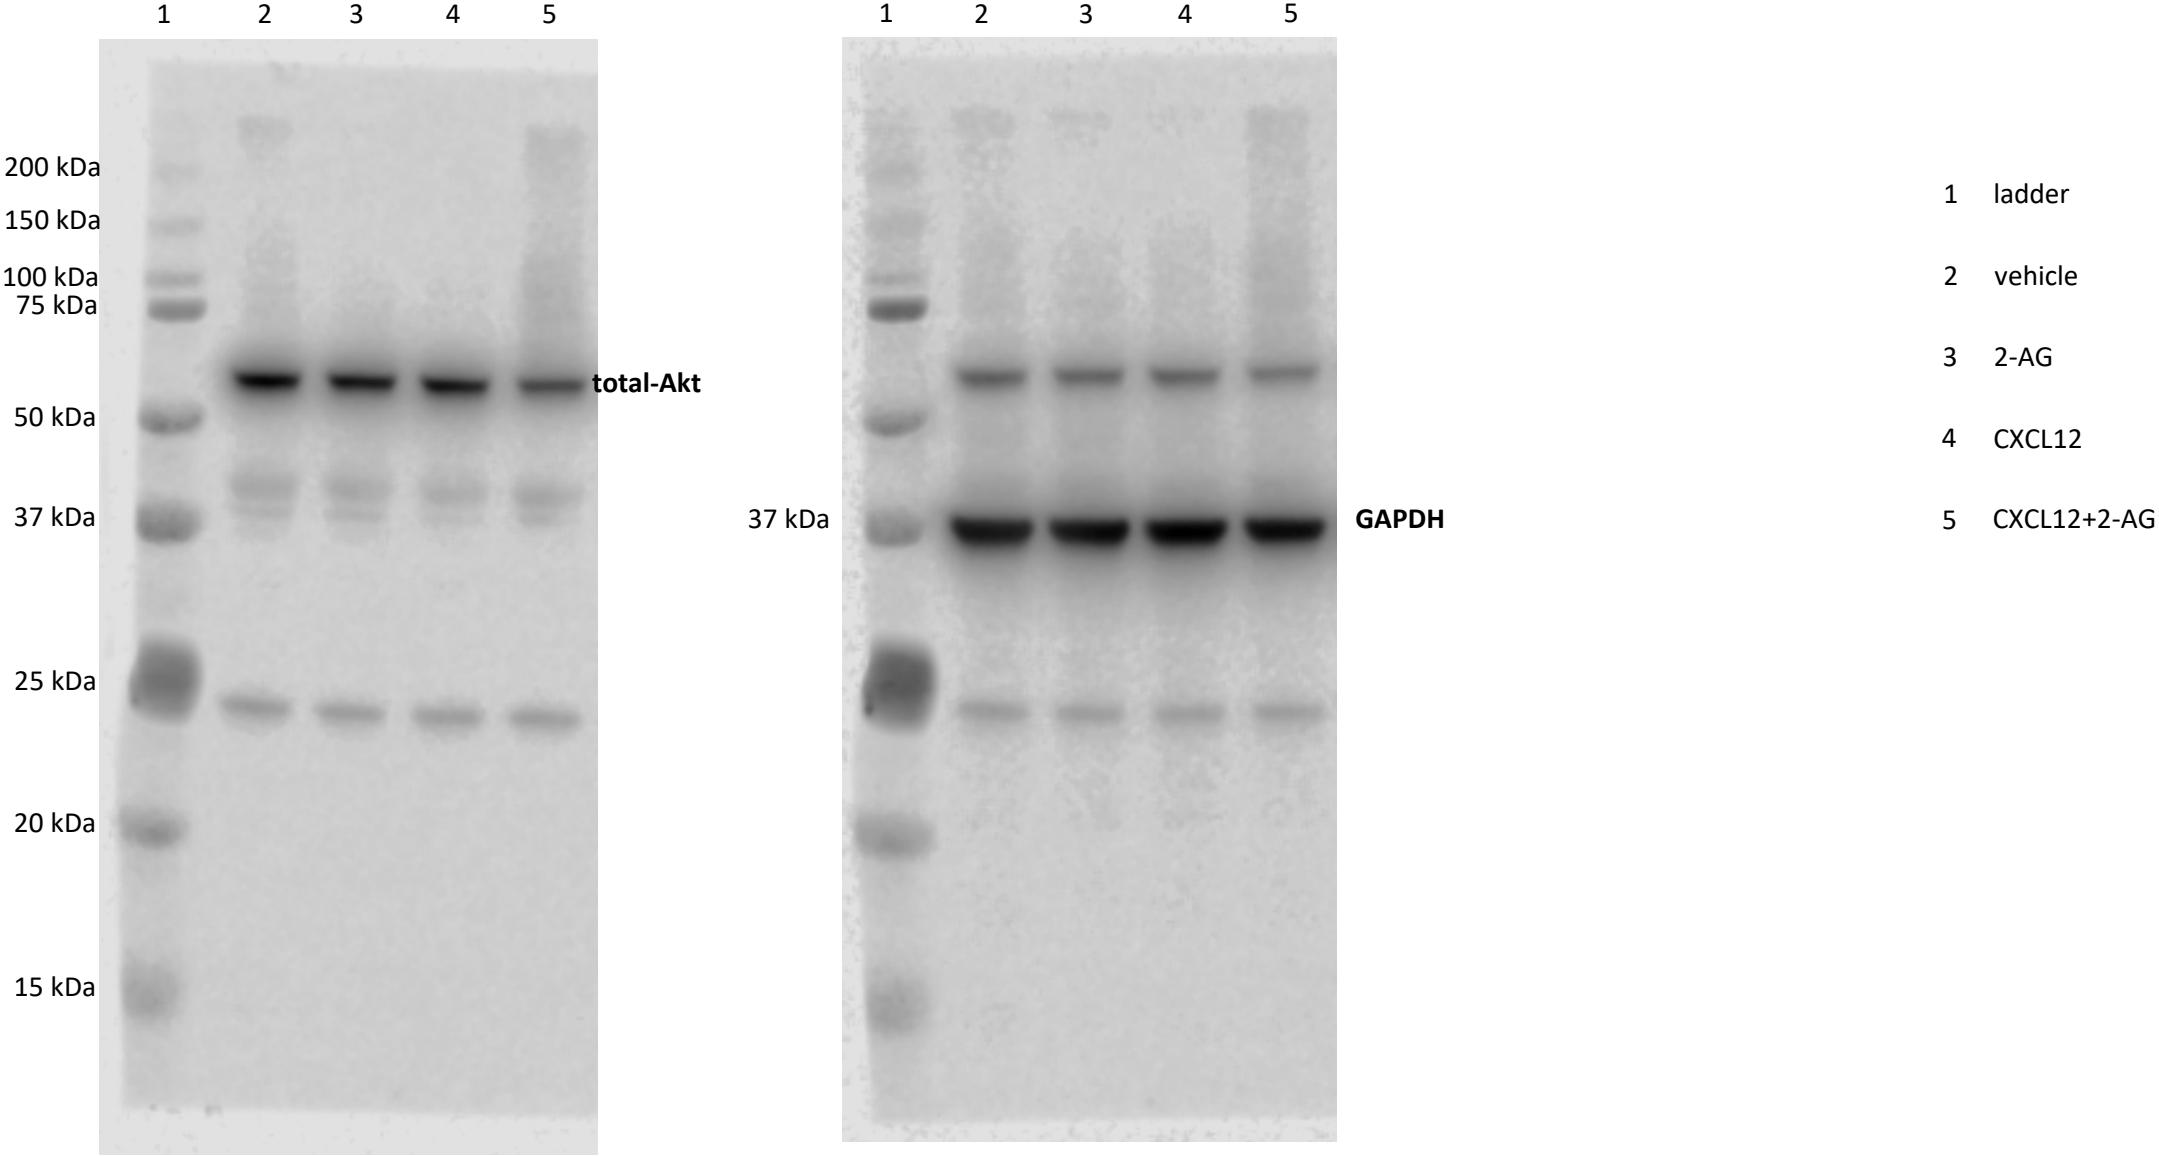

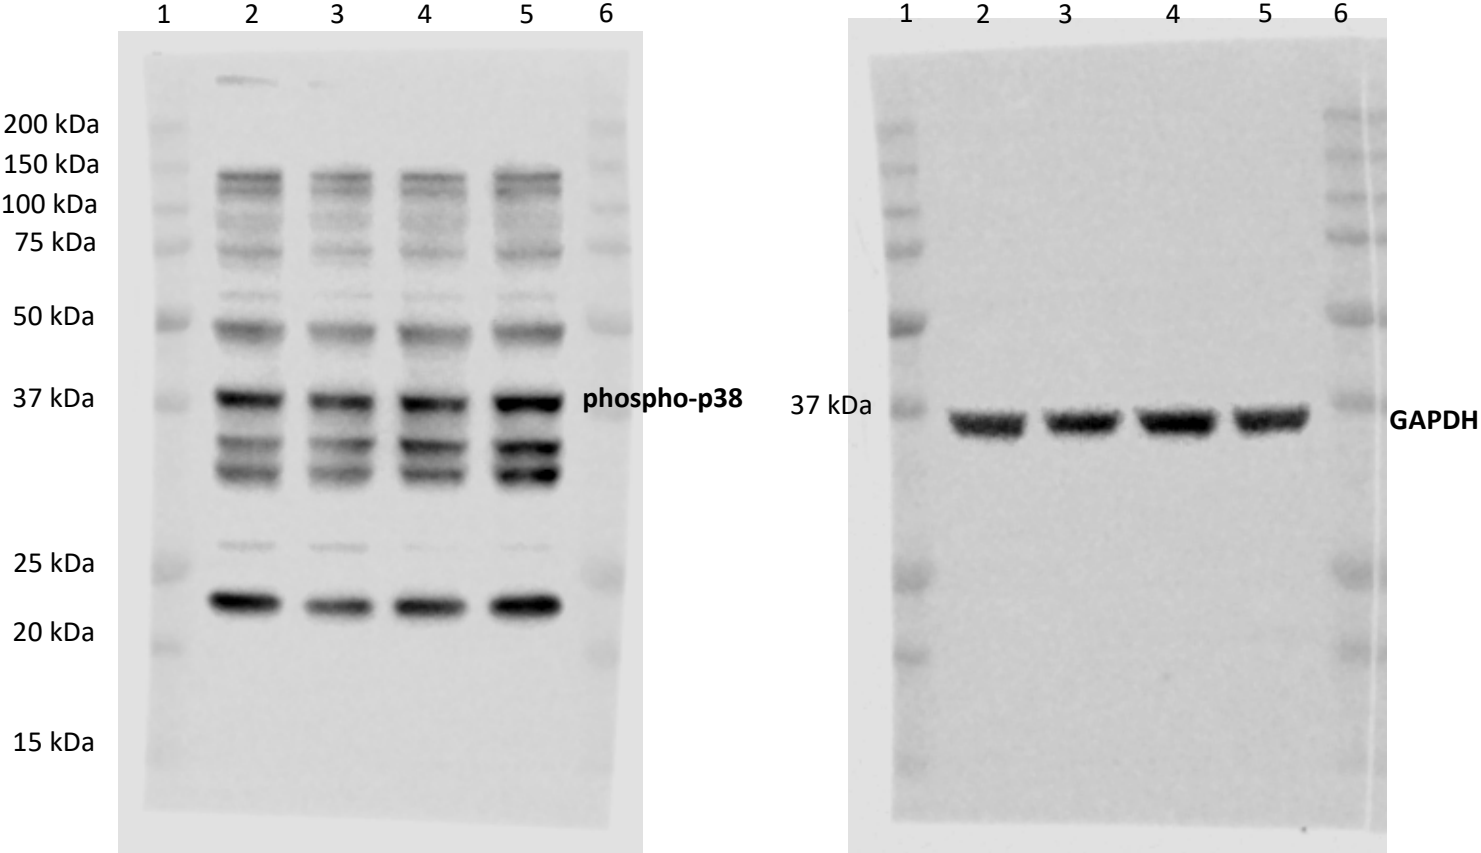

- 1 ladder
- 2 vehicle
- 3 2-AG
- 4 CXCL12
- 5 CXCL12+2-AG
- 6 ladder

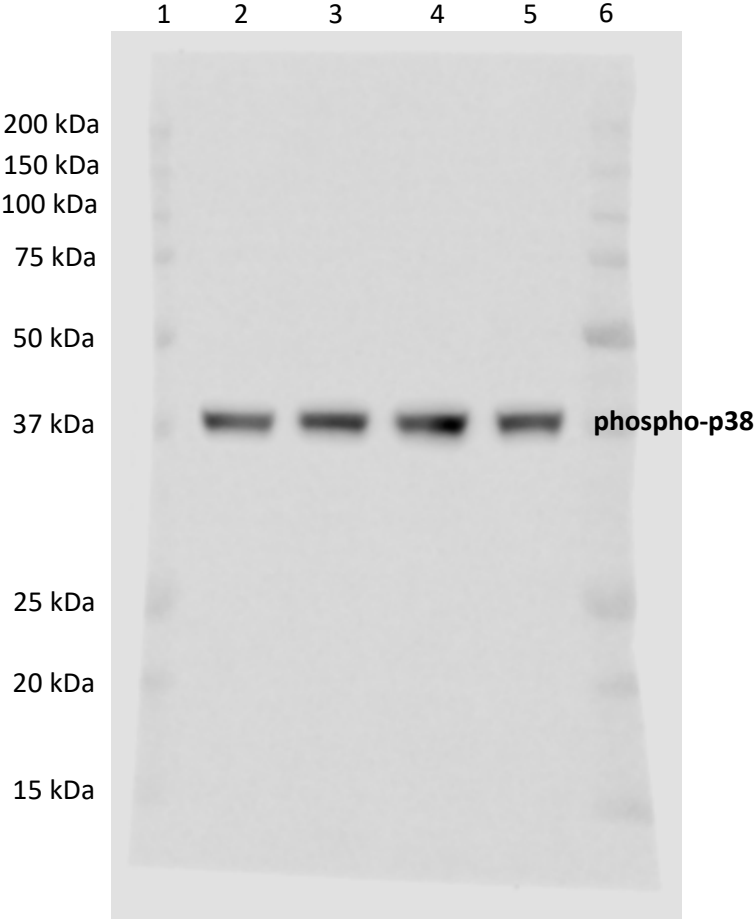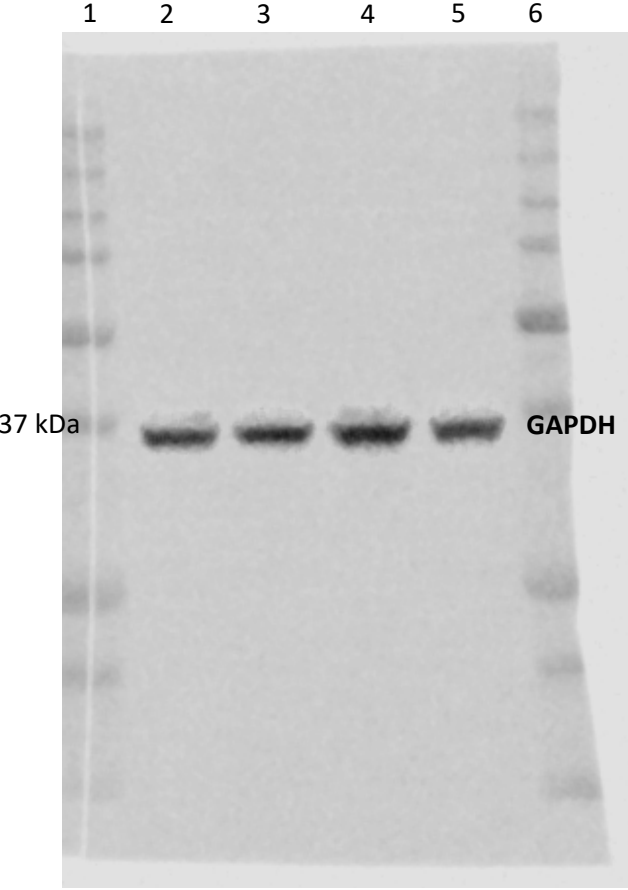

- 1 ladder
- 2 vehicle
- 3 2-AG
- 4 CXCL12
- 5 CXCL12+2-AG
- 6 ladder

Figure 9

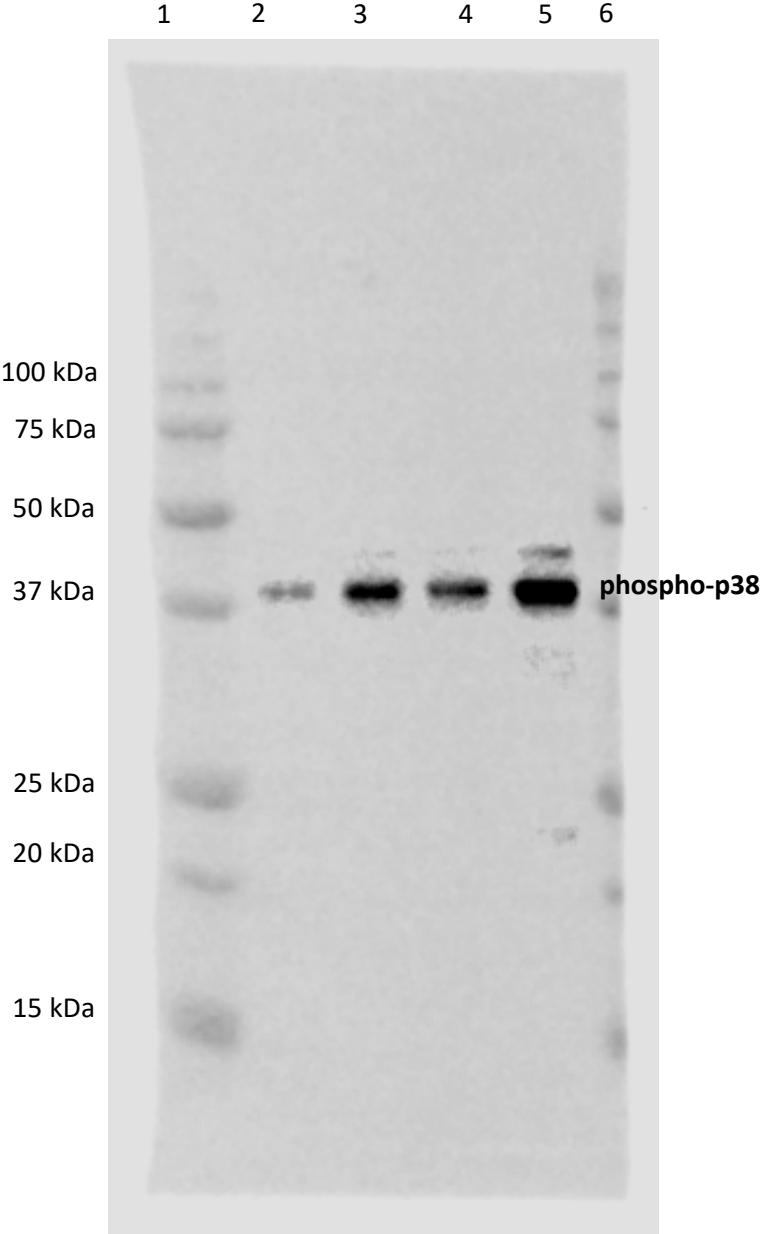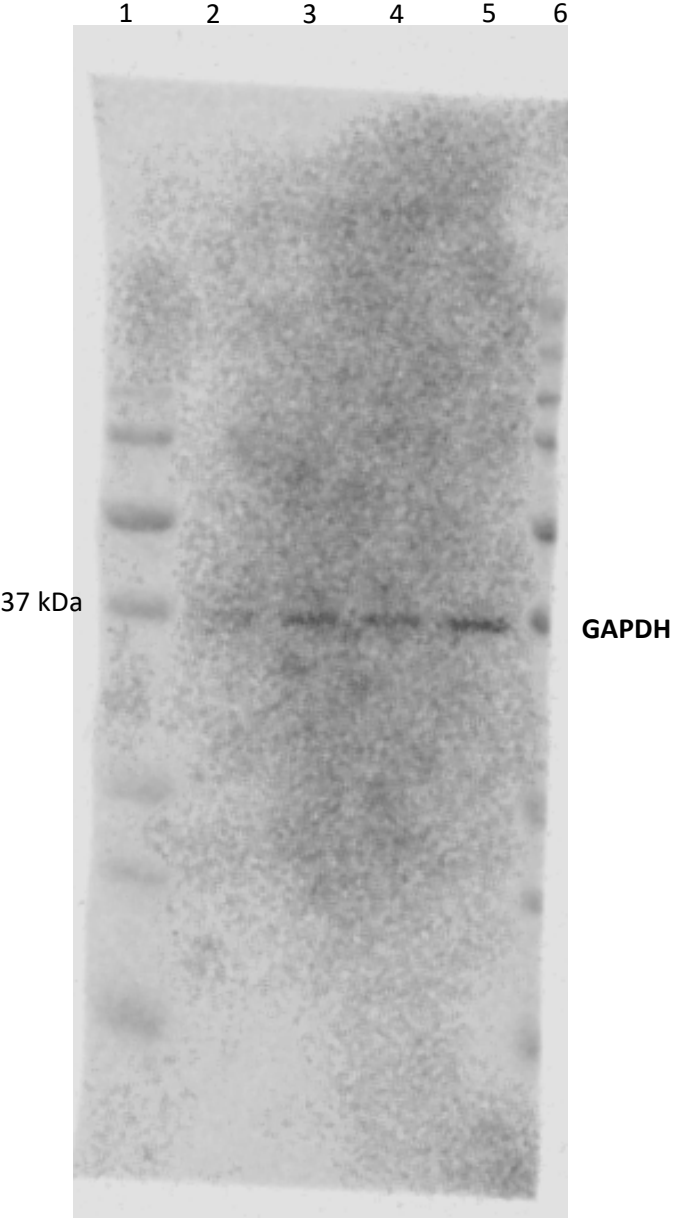

- 1 ladder
- 2 vehicle
- 3 2-AG
- 4 CXCL12
- 5 CXCL12+2-AG
- 6 ladder

Sample 40

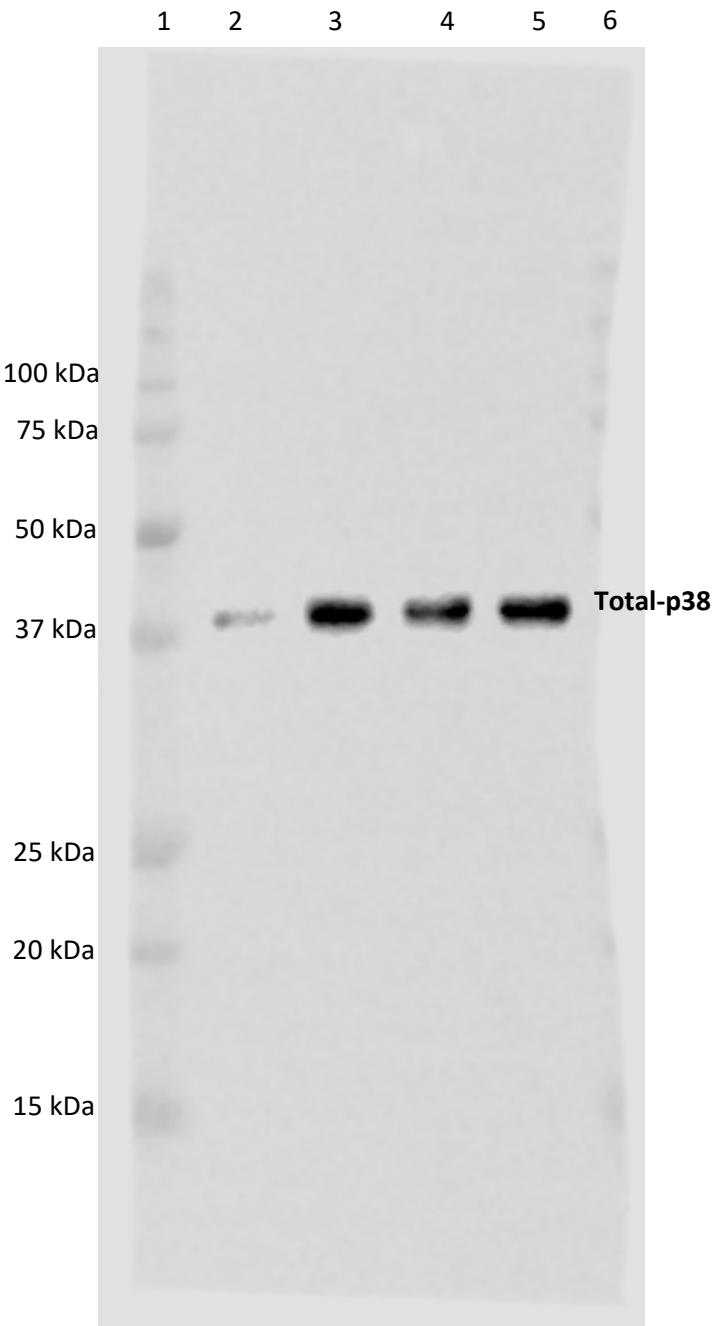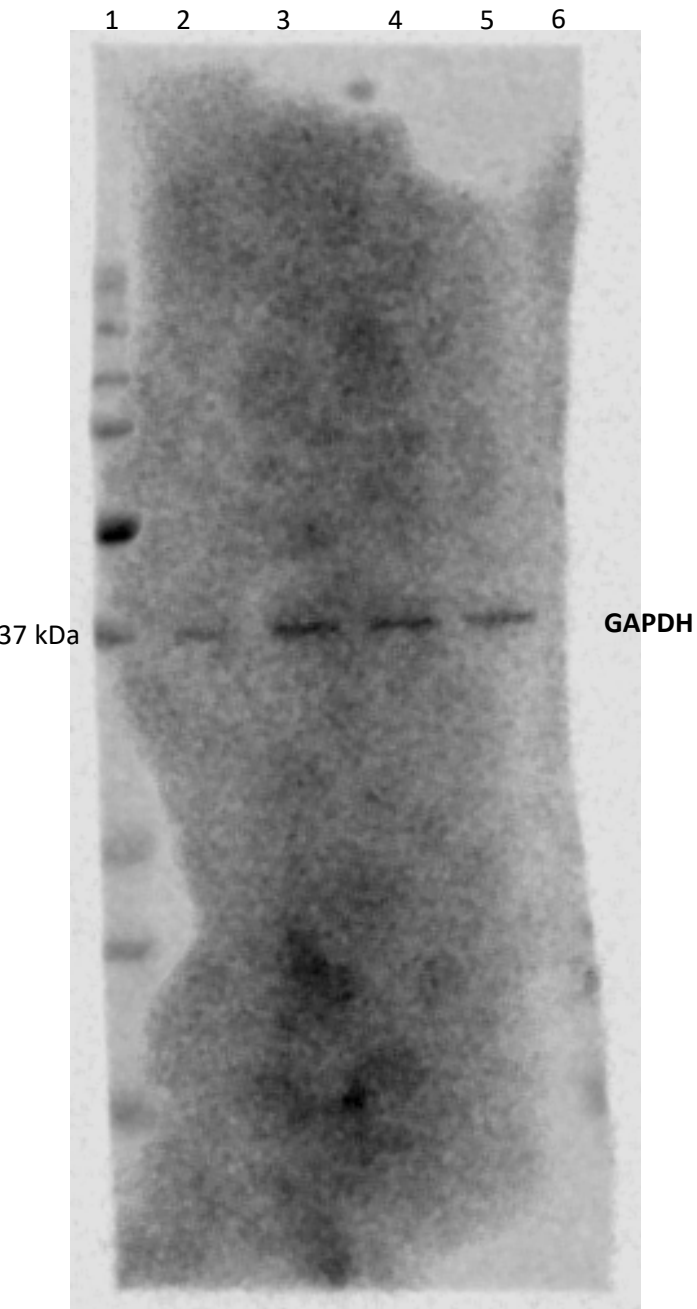

Total-p38

- 1 ladder
- 2 vehicle
- 3 2-AG
- 4 CXCL12
- 5 CXCL12+2-AG
- 6 ladder

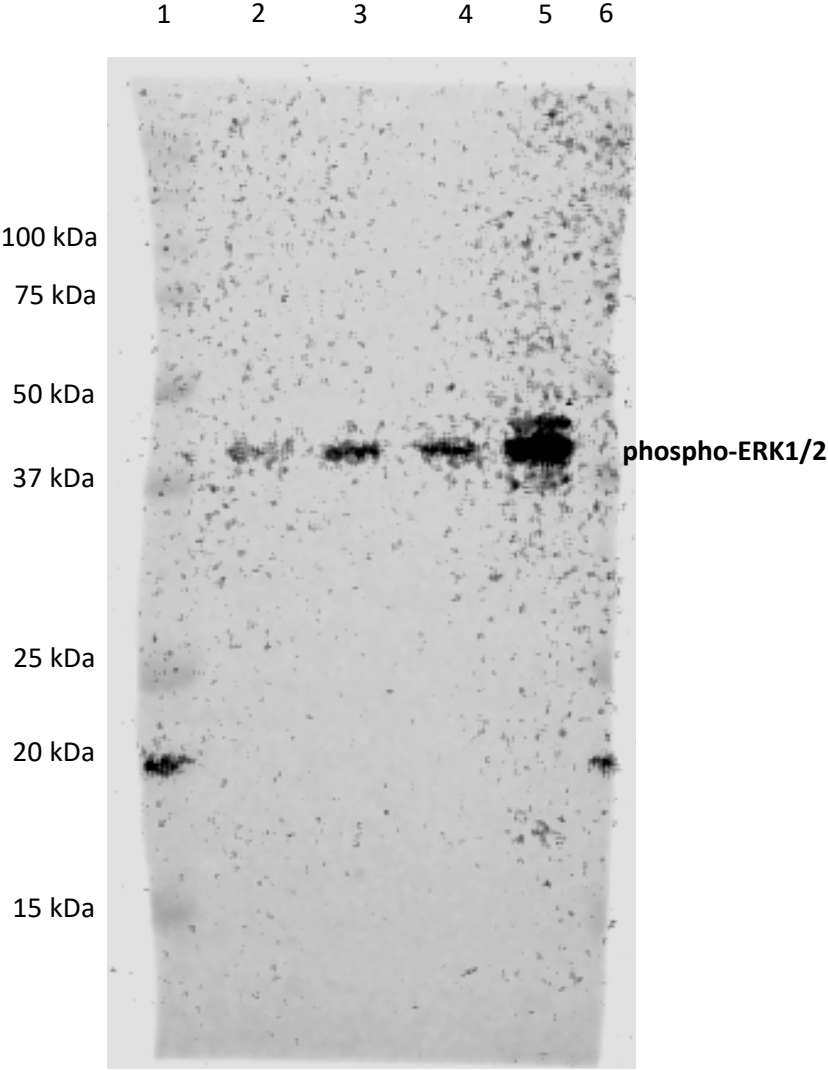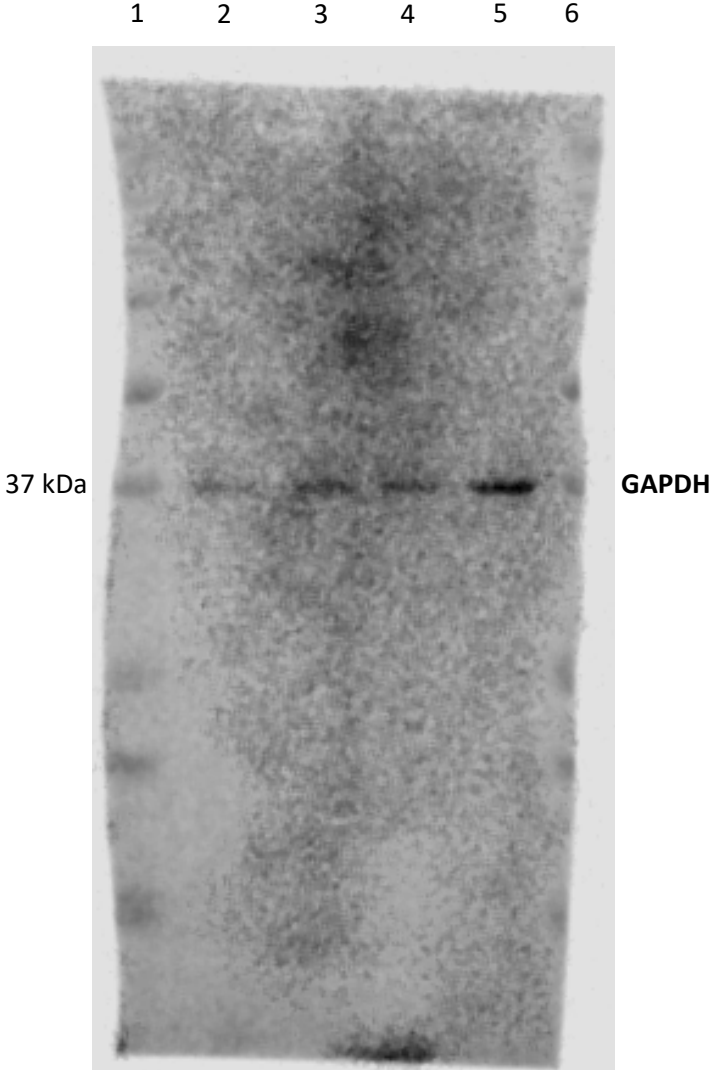

- 1 ladder
- 2 vehicle
- 3 2-AG
- 4 CXCL12
- 5 CXCL12+2-AG
- 6 ladder



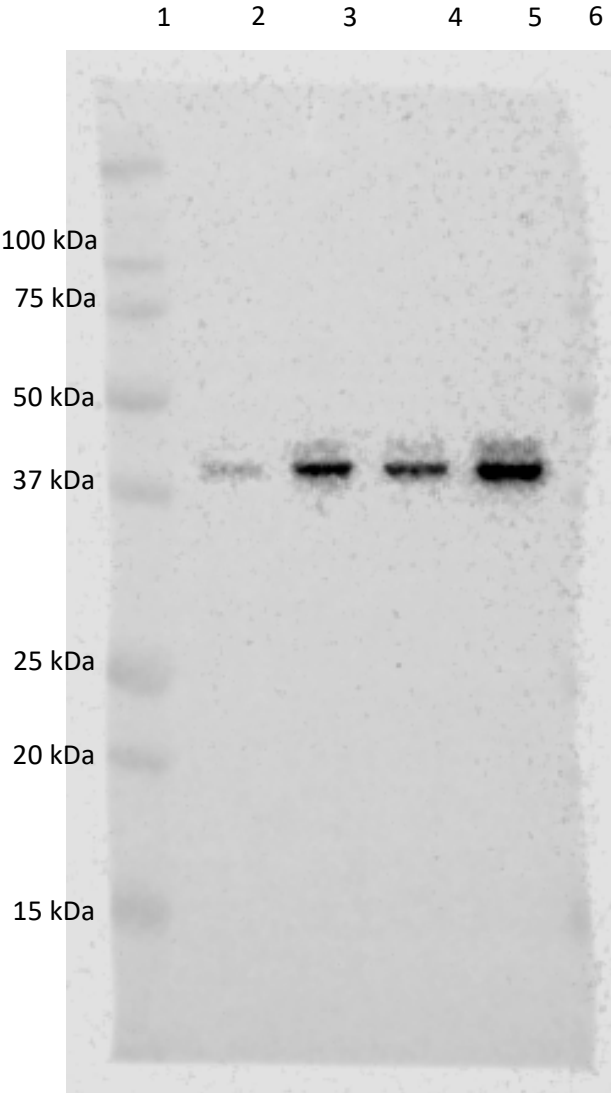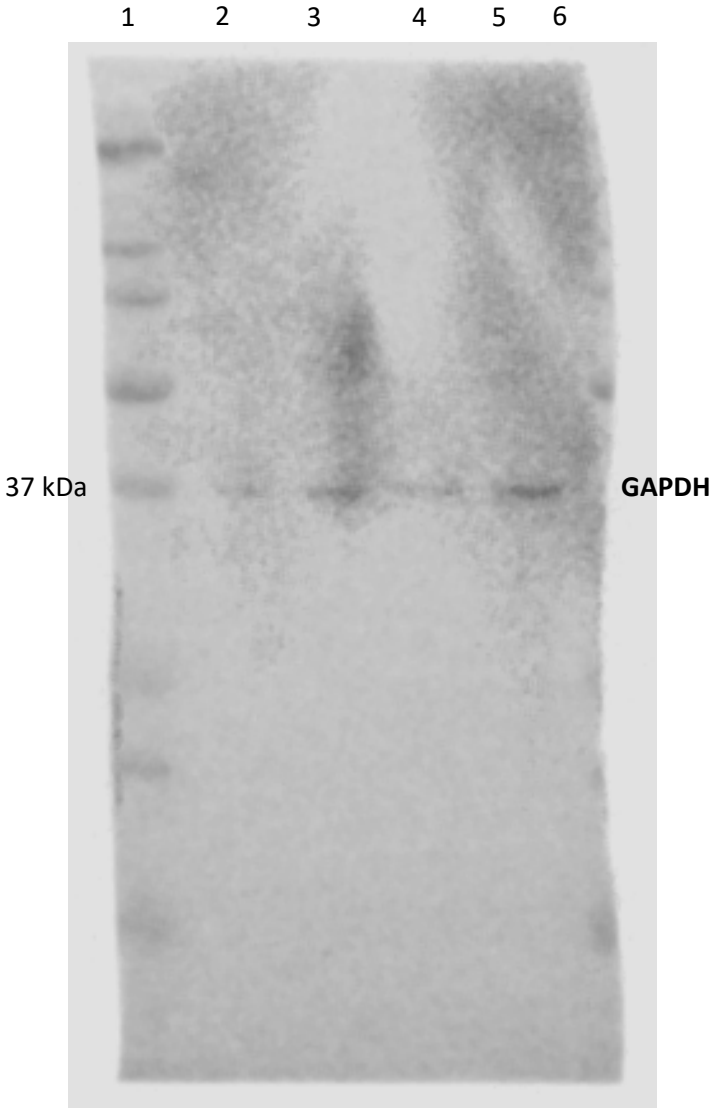

- 1 ladder
- 2 vehicle
- 3 2-AG
- 4 CXCL12
- 5 CXCL12+2-AG
- 6 ladder

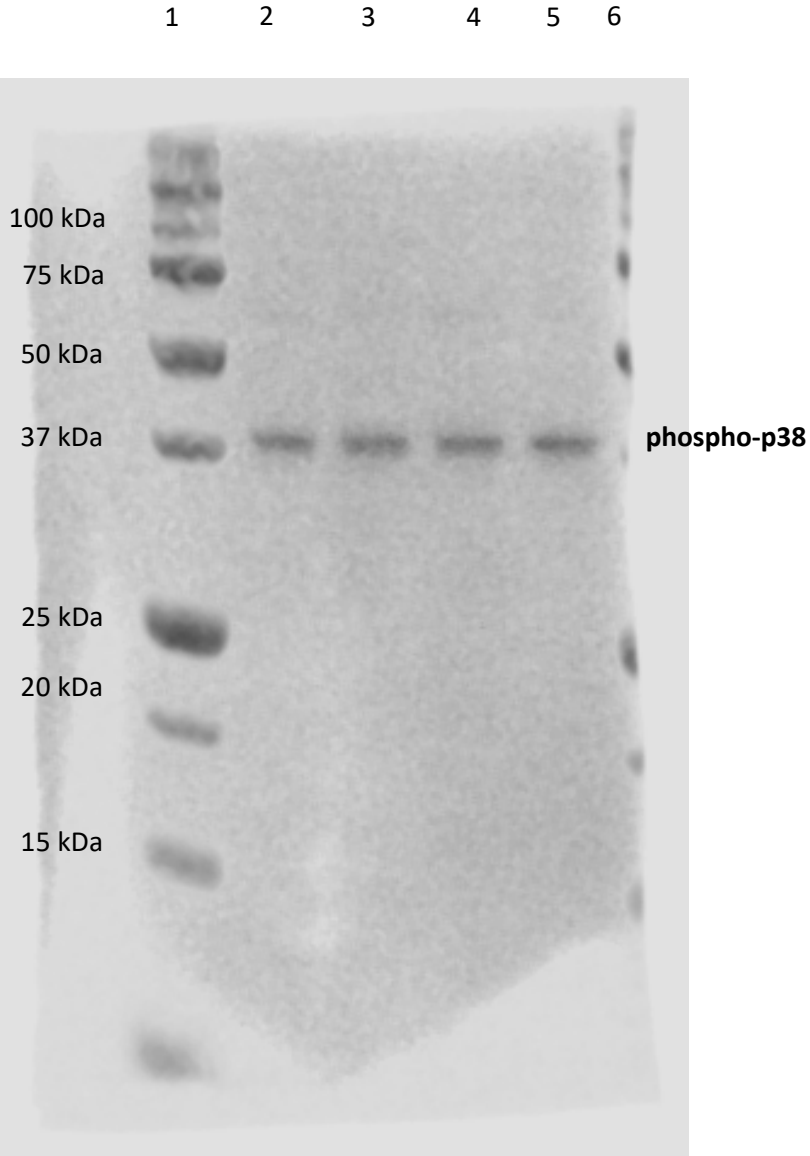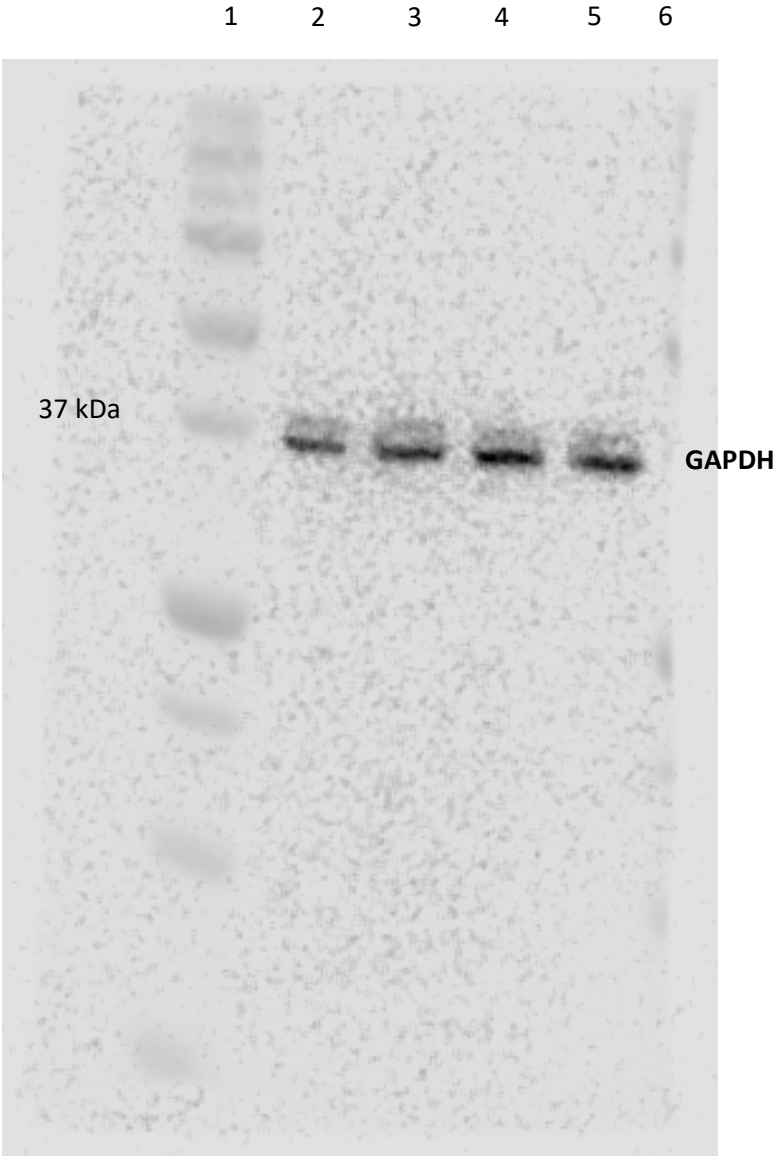

- 1 ladder
- 2 vehicle
- 3 2-AG
- 4 CXCL12
- 5 CXCL12+2-AG
- 6 ladder

Sample 41

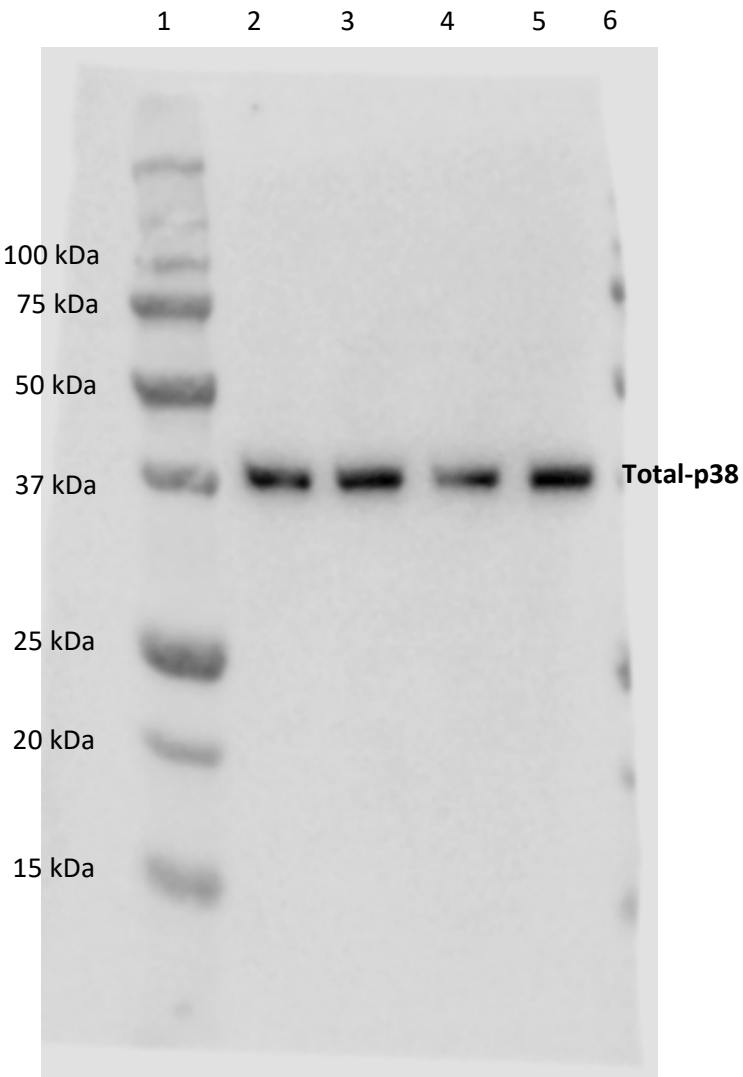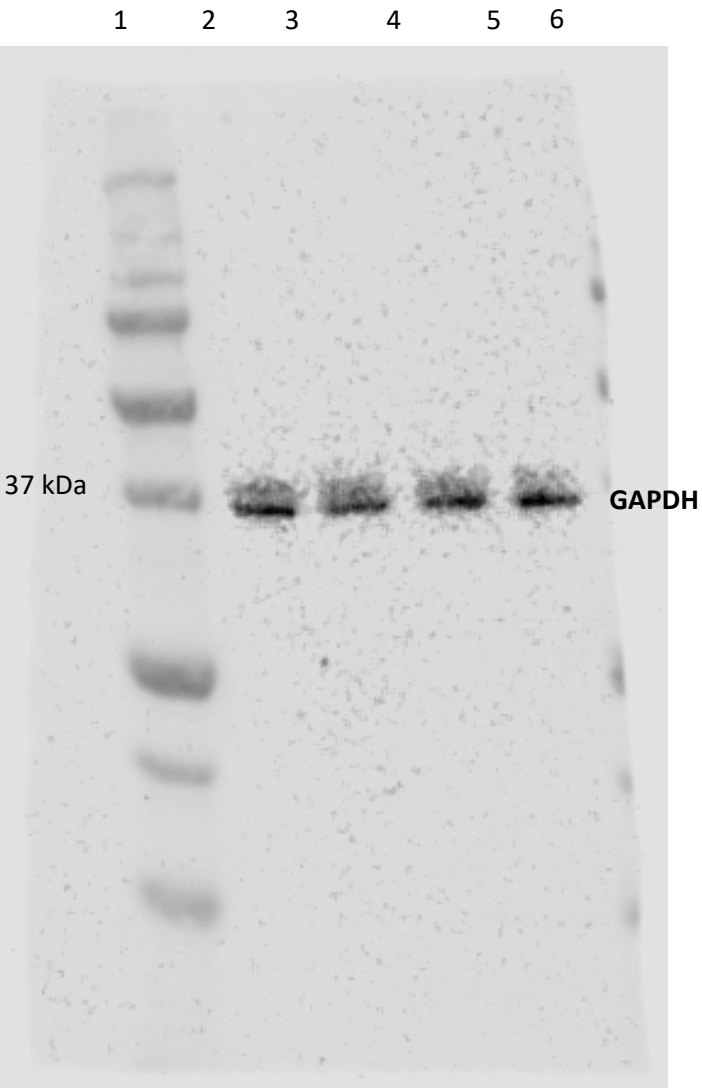

Total-p38

- 1 ladder
- 2 vehicle
- 3 2-AG
- 4 CXCL12
- 5 CXCL12+2-AG
- 6 ladder

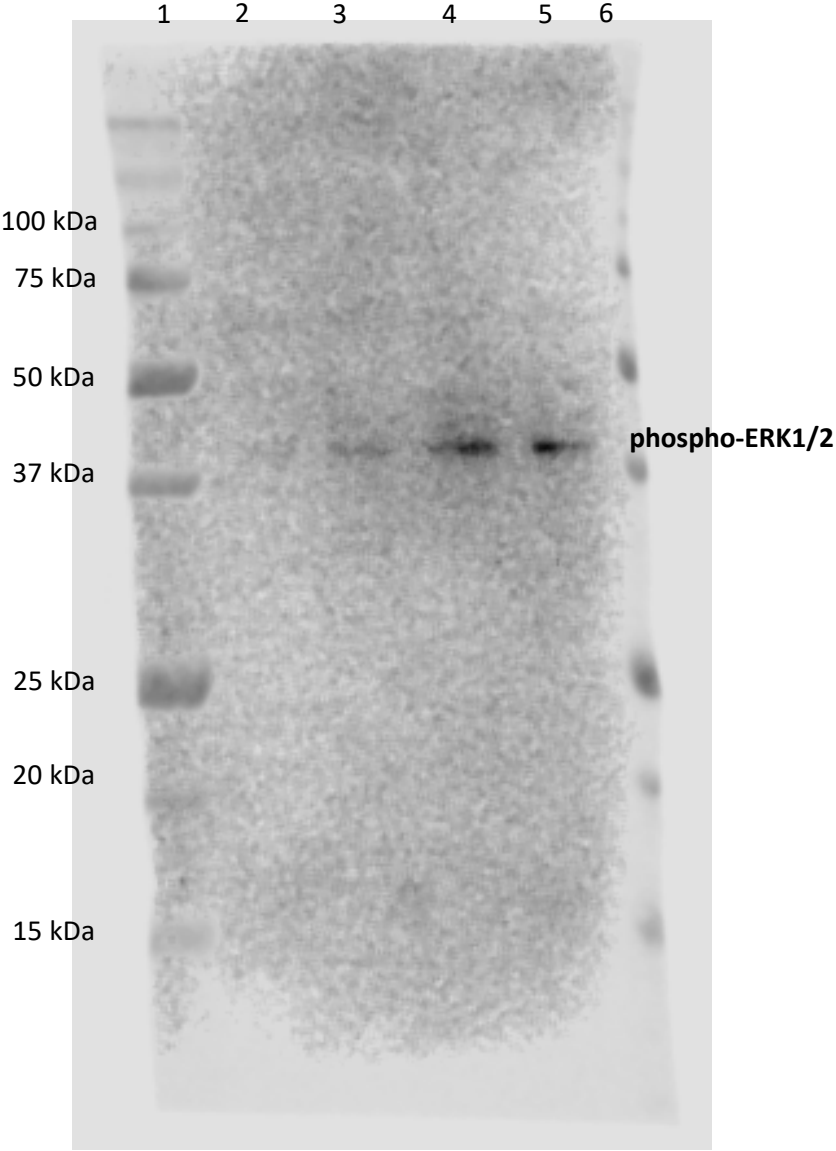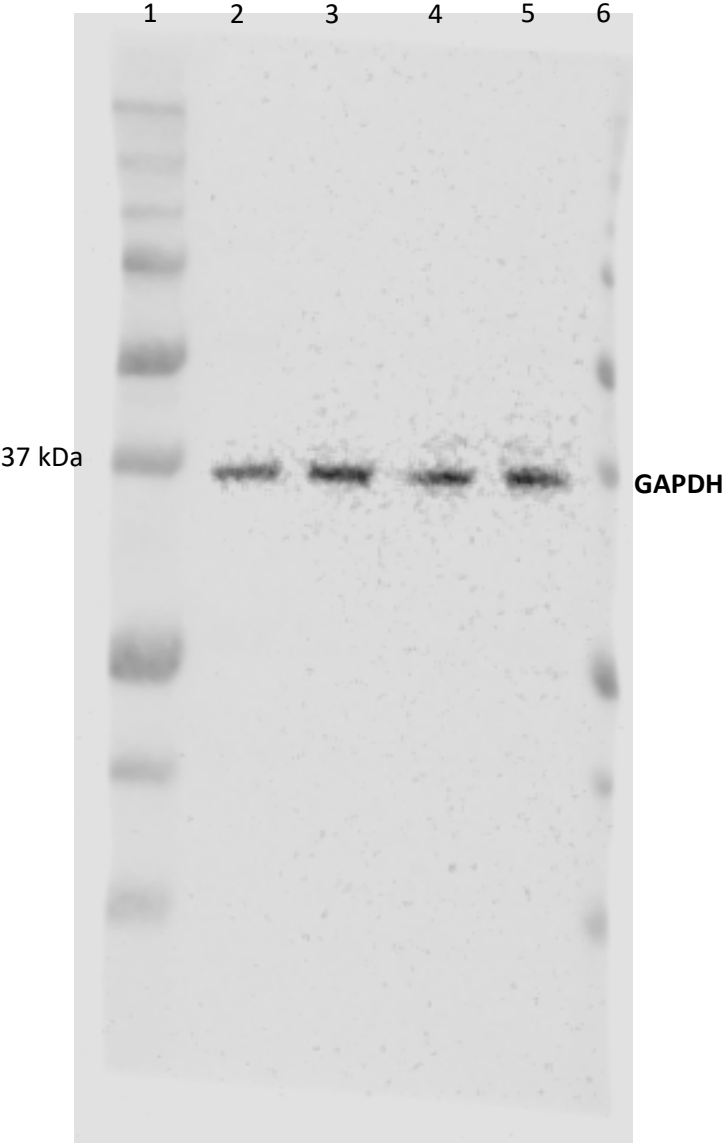

- 1 ladder
- 2 vehicle
- 3 2-AG
- 4 CXCL12
- 5 CXCL12+2-AG
- 6 ladder

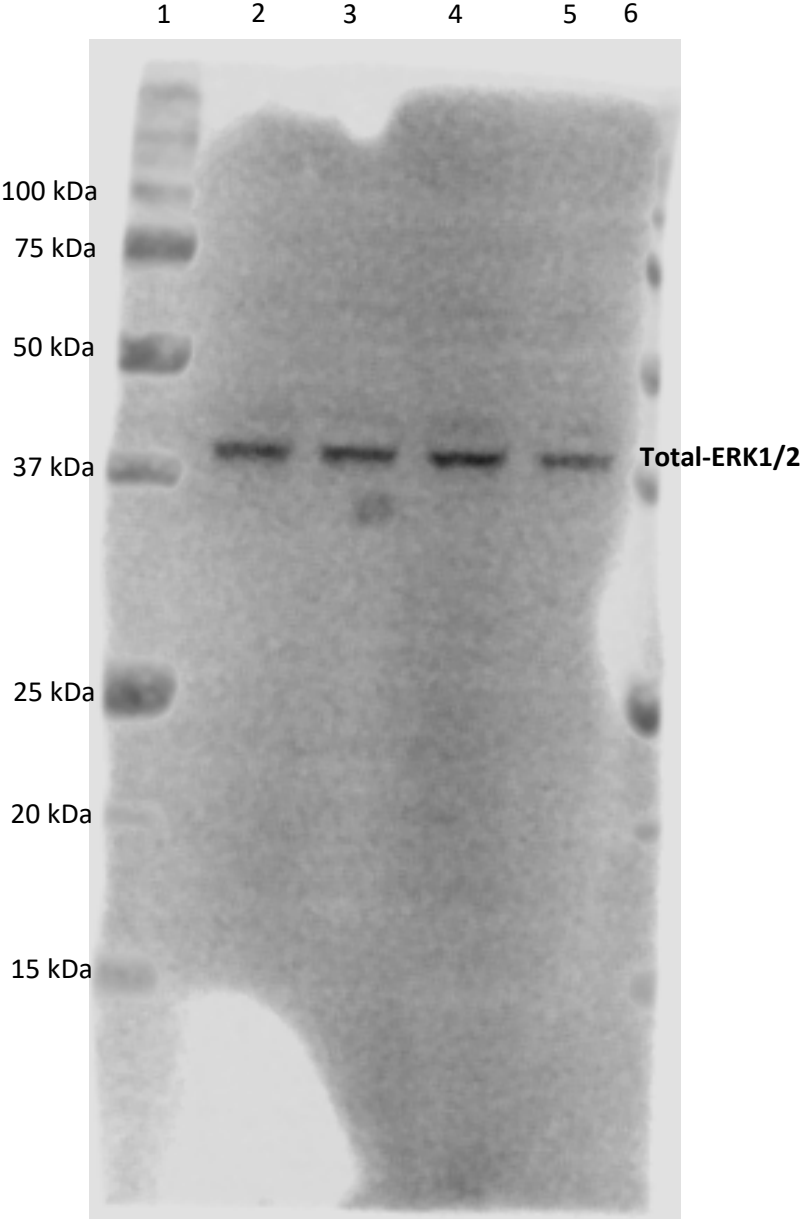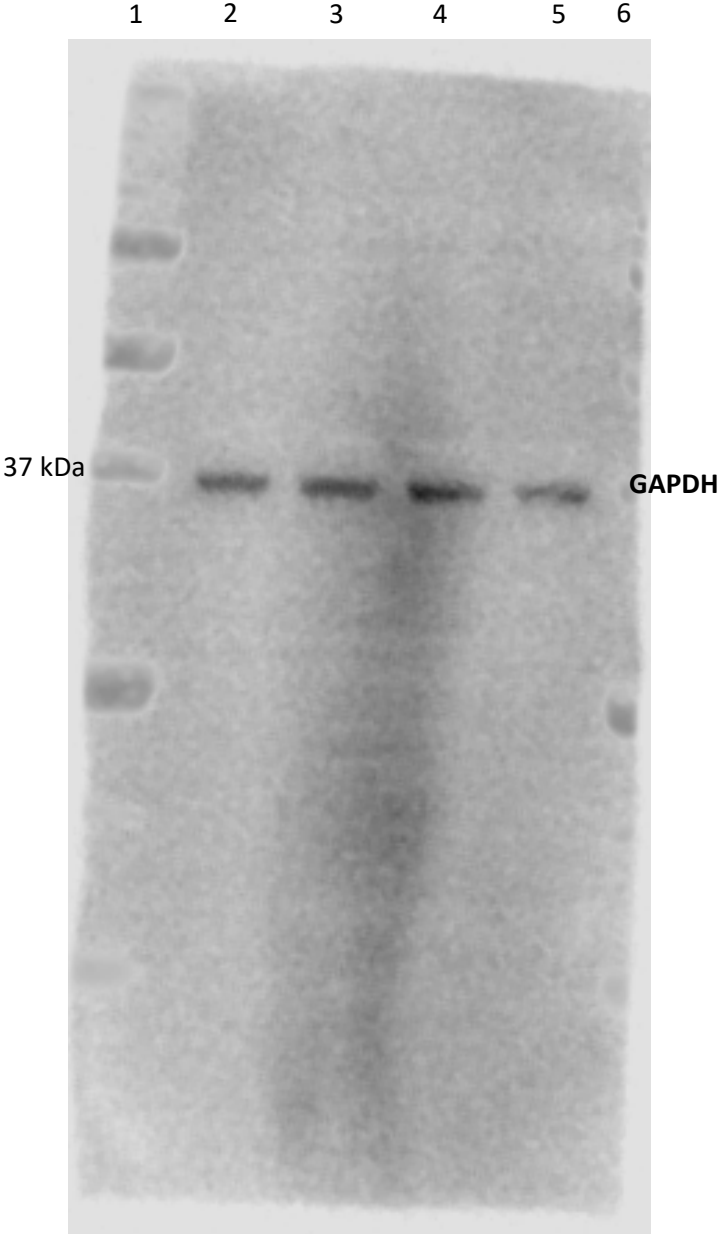

- 1 ladder
- 2 vehicle
- 3 2-AG
- 4 CXCL12
- 5 CXCL12+2-AG
- 6 ladder

# Supplementary Figure S6

Cell lines

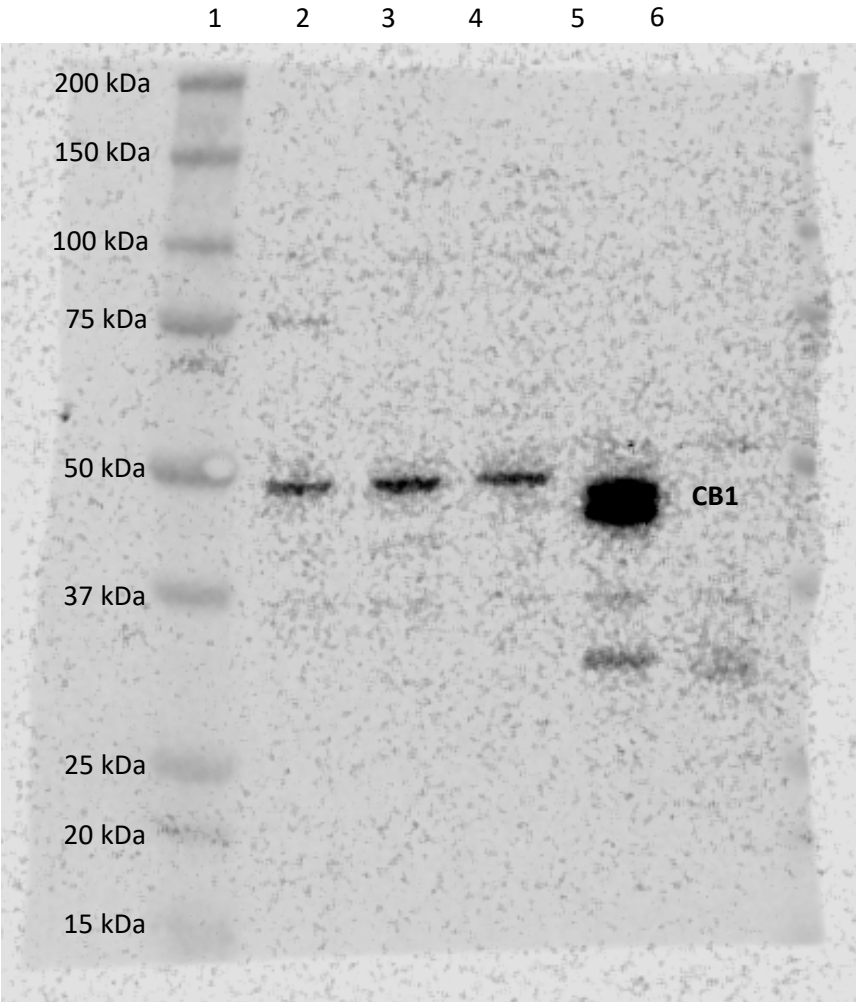

Cannabinoid receptors

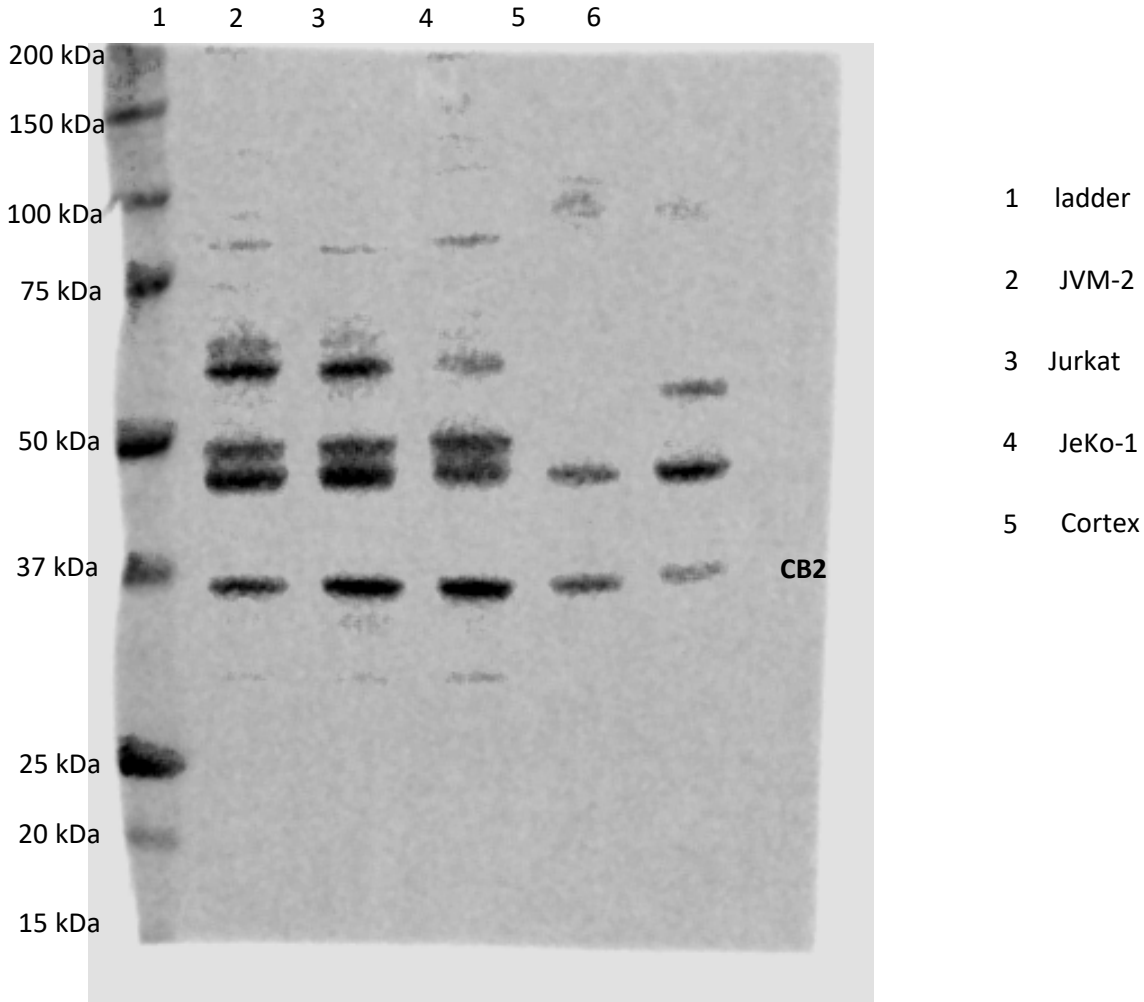

Supplement: s1 [file s1]
